1 Classification: Biological Sciences, Evolutionary Biology

2

3 **The generalist herbivore *Tetranychus urticae* (Koch) adapts to novel plant hosts through rapid**  
4 **evolution of metabolic resistance**

5

6 Golnaz Salehipourshirazi<sup>1,#</sup>, Kristie Bruinsma<sup>1,#</sup>, Huzefa Ratlamwala<sup>1,#</sup>, Sameer Dixit<sup>1,#</sup>, Vicent  
7 Arbona<sup>3</sup>, Emilie Widemann<sup>1</sup>, Maja Milojevic<sup>1</sup>, Pengyu Jin<sup>1</sup>, Nicolas Bensoussan<sup>1</sup>, Aurelio Gómez-  
8 Cadenas<sup>3</sup>, Vladimir Zhurov<sup>1</sup>, Miodrag Grbic<sup>1,2,4</sup>, Vojislava Grbic<sup>1,\*</sup>

9

10 <sup>1</sup>Department of Biology, The University of Western Ontario, London, Ontario, N6A 5B8, Canada.

11 <sup>2</sup> Instituto de Ciencias de la Vid y el Vino (CSIC, UR, Gobierno de La Rioja), 26006 Logrono, Spain.

12 <sup>3</sup>Departament de Ciències Agràries i del Medi Natural, Universitat Jaume I, E-12071 Castelló de  
13 la Plana, Spain. <sup>4</sup> Department of Biology, University of Belgrade, Serbia

14

15 <sup>#</sup>These authors contributed equally

16

17 <sup>\*</sup>Corresponding author: Vojislava Grbic, The University of Western Ontario, 1151 Richmond St,  
18 London, Ontario, N6A 5B8, Canada; phone: 519 661-2111, e-mail: [vgrbic@uwo.ca](mailto:vgrbic@uwo.ca)

19

20 **Abstract**

21 Genetic adaptation, occurring over long evolutionary time, enables host-specialized herbivores  
22 to develop novel resistance traits and to counteract the defenses of a narrow range of host  
23 plants. In contrast, physiological acclimation, leading to the suppression and/or detoxification of  
24 host defenses is hypothesized to enable generalists to shift between plant hosts. Here, we  
25 examined the long-term response of an extreme generalist, the two-spotted spider mite,  
26 *Tetranychus urticae* Koch (TSSM), to the shift to the non-preferred and novel host plant  
27 *Arabidopsis thaliana*. We identified the key requirement of two tiers of cytochrome P450  
28 monooxygenases for TSSM adaptation to *Arabidopsis*: general xenobiotic-responsive P450s that  
29 have a limited contribution to mite adaptation to *Arabidopsis* and adaptation-associated P450s  
30 that efficiently counteract *Arabidopsis* defenses, illustrating that in about 25 generations of  
31 TSSM selection on *Arabidopsis* plants mites evolved metabolic resistances characteristic of both  
32 generalist and specialist herbivores.

33

34 **Keywords:** *Arabidopsis*, host shift, biochemical adaptation, plant allelochemicals, metabolic  
35 resistance, suppression of plant defenses, xenobiotic responsiveness, detoxification, *NADPH*-  
36 *cytochrome P450 reductase*, RNAi, plant-herbivore interaction

37

## 38 Introduction

39 During millions of years of co-evolution with their host plants, herbivores have developed two  
40 main strategies to counteract plant resistance traits. Specialist herbivores have evolved highly  
41 efficient adaptation mechanisms against a limited set of host defenses, including: modified  
42 feeding behavior (Helmus and Dussourd, 2005), suppression of plant defenses (Zhao et al.,  
43 2015), reduced xenobiotic target site sensitivity (Dobler et al., 2012), sequestration (Beran et al.,  
44 2018) and detoxification of plant toxins (Ratzka et al., 2002). In contrast, generalist herbivores  
45 evolved an innate ability to feed on a broad range of host plants that display a wide array of  
46 resistance traits (Despres et al., 2007; Barrett and Heil, 2012; Heidel-Fischer and Vogel, 2015).  
47 Attenuation of plant responses induced by herbivore feeding, consistent with the suppression of  
48 host defenses, have been described for many generalists (Zarate et al., 2007; Kant et al., 2008;  
49 Musser et al., 2012; Wu et al., 2012). Consistently, effectors that modulate plant defenses have  
50 been identified in secretions of a number of generalist herbivores belonging to different feeding  
51 guilds (Musser et al., 2002; Hogenhout and Bos, 2011; Wu et al., 2012; Bass et al., 2013;  
52 Jonckheere et al., 2016; Kaloshian and Walling, 2016; Basu et al., 2018). Their mode of action is  
53 largely unknown but, to be effective against many host plants, it is assumed that they either  
54 target conserved compounds or pathways associated with plant defense, or that they  
55 collectively have a very broad spectrum activity with only a specific subset being effective  
56 against any particular host. Another mechanism of host-adaptation is metabolic resistance  
57 whereby herbivores effectively detoxify ingested plant toxins. In specialists, metabolic resistance  
58 is based on a limited number of detoxification enzymes that have high specificity and efficiency  
59 for a given plant toxin (Ratzka et al., 2002; Li et al., 2003; Wittstock et al., 2004; Mao et al., 2006;  
60 Gloss et al., 2014; Heidel-Fischer et al., 2019). Genes encoding these enzymes are usually  
61 expressed constitutively at high level and can be further induced in the presence of plant toxin.  
62 In contrast, it is assumed that generalist herbivores rely on ubiquitous classes of detoxification  
63 enzymes (e.g. carboxyl/cholinesterases (CCEs), cytochrome P450 monooxygenases (CYP450s),  
64 glutathione S-transferases (GSTs), UDP-glycosyltransferases (UGTs), and ABC transporters  
65 (ABCs)) that were shown to accept structurally diverse substrates which they metabolize with  
66 low levels of activity (Li et al., 2004; Halon et al., 2015; Shi et al., 2018; Snoeck et al., 2019).  
67 Genes encoding general detoxification enzymes underwent extensive amplification and  
68 neofunctionalization, and are transcriptionally responsive to a wide range of xenobiotics (Govind  
69 et al., 2010; Grbic et al., 2011; Zhurov et al., 2014; Wybouw et al., 2015; Muller et al., 2017;  
70 Schweizer et al., 2017). Thus, it is hypothesized that attenuation of plant defenses combined  
71 with the expanded and functionally versatile detoxification capabilities enable generalist  
72 herbivores to cope with diverse allelochemicals and to feed on many host plants.

73 *Tetranychus urticae* Koch (TSSM) is a striking example of generalist herbivore that feeds  
74 on more than 1,100 plant species from over 100 families (Migeon and Dorkeld, 2006-2019).  
75 Such a wide host range indicates that TSSM can counteract a great diversity of plant resistance  
76 traits. However, individual TSSM populations do not perform equally well on all potential host  
77 plants. Instead, TSSM has the outstanding ability to adapt to new hosts, in just 20 to 25  
78 generations (Gould, 1979; Fry, 1989; Magalhaes et al., 2007; Wybouw et al., 2015). The  
79 mechanism of this extremely rapid host adaptability is not known. The analysis of plant  
80 transcriptional changes following the host shift revealed that some TSSM populations can  
81 suppress plant induced responses (Kant et al., 2008; Wybouw et al., 2015). At the same time,  
82 TSSM massively reprograms its detoxification capacity (Dermauw et al., 2013; Zhurov et al.,  
83 2014; Wybouw et al., 2015) and the complement of its salivary secretions (Jonckheere et al.,  
84 2016; Villarroel et al., 2016; Jonckheere et al., 2018). However, no functional evidence explains  
85 whether these changes contribute to TSSM host adaptation or if they merely reflect stress

86 responses or a different feeding physiology due to the host shift. Thus, it remains unclear  
87 whether adaptation to the new host plant by *T. urticae* requires manipulation of host plant  
88 defenses, detoxification of host allelochemicals or both, and if the initial xenobiotic responses  
89 are sufficient for TSSM adaptation to a new host, or if changes over a longer period of time are  
90 required for the evolution of TSSM host-adaptation.

91 *Arabidopsis thaliana* is a non-preferred host for the TSSM London reference population  
92 that is reared on beans – *Phaseolus vulgaris* (Zhurov et al., 2014). In an experimental  
93 evolutionary setup, we adapted the TSSM London ancestral population to *Arabidopsis*. Taking  
94 advantage of well characterized *Arabidopsis* induced defenses against mite herbivory (Zhurov et  
95 al., 2014), we show that *Arabidopsis*-adapted TSSM do not suppress them. Using manipulative  
96 pharmacological and reverse genetics experiments that independently suppressed the activities  
97 of families of detoxification enzymes we provide, for the first time, *in vivo* functional evidence  
98 that *T. urticae* requires two tiers of P450 enzyme activities for host adaptation. We show that  
99 P450s responsive to the initial encounter of the new host have a small contribution to mite  
100 adaptation to *Arabidopsis*. Instead, a second tier of P450 activity, specific to *Arabidopsis*-  
101 adapted mites, is the major contributor to mite adaptation. Our data demonstrate that the  
102 reprogramming of the mite detoxification system occurred over approximately 25 generations  
103 of TSSM selection on *Arabidopsis* resulting in metabolic resistance with features characterized in  
104 both generalist and specialist herbivores. Our results show that the detoxification mechanisms  
105 involved in herbivore adaptation to novel host plants can evolve extremely rapidly and are key  
106 to TSSM adaptation to *Arabidopsis*.

## 107 **Results and discussion**

### 108 **TSSM feeding induces JA-regulated *Arabidopsis* defense compounds**

109  
110 Jasmonic acid (JA) and its bioactive conjugate jasmonoyl-isoleucine (JA-Ile) were shown to be  
111 required for *Arabidopsis* defenses against TSSM herbivory (Zhurov et al., 2014). To determine if  
112 JA-induced processes are sufficient for *Arabidopsis* resistance against TSSM, we sprayed  
113 *Arabidopsis* plants with methyl jasmonate (MeJA) and determined the effect of induced JA-  
114 responses on mite performance. Mite fecundity dramatically decreased (5-fold) on MeJA  
115 treated Col-0 plants, Figure 1A, indicating that JA-induced defenses are major components of  
116 *Arabidopsis* resistance against mite herbivory. JA responsiveness is mediated by COI1 as well as  
117 the MYC2, MYC3 and MYC4 (MYC2,3,4) transcriptional activators that induce the expression of a  
118 wide spectrum of JA-regulated genes, Figure 1B and (Devoto et al., 2005; Fernandez-Calvo et al.,  
119 2011). The *myc2,3,4* mutant plants were extremely susceptible to *T. urticae*, Figure 1A. Among  
120 MYC2,3,4-regulated genes are *CYP79B2* and *CYP79B3* that are required for the synthesis of Trp-  
121 derived secondary metabolites, Figure 1A and (Hull et al., 2000; Mikkelsen et al., 2000;  
122 Schweizer et al., 2013). Trp-derived secondary metabolites include several known  
123 allelochemicals (indole glucosinolates, camalexin and cyanogenic glucosides) directly  
124 synthesized from Trp and callose whose synthesis is indirectly regulated through this pathway  
125 (Bednarek, 2012; Rajniak et al., 2015). Of these compounds, indole glucosinolates (IGs) were  
126 implicated in deterrence of aphid (Kim and Jander, 2007; Kim et al., 2008), whiteflies (Elbaz et  
127 al., 2012), TSSM (Zhurov et al., 2014) and leaf mining drosophilid (Whiteman et al., 2011;  
128 Whiteman et al., 2012) herbivory. The modest increase in TSSM fecundity when mites fed on  
129 *cyp79b2 cyp79b3* plants, Figure 1A, indicates that Trp-dependent defenses have a relatively  
130 minor contribution to *Arabidopsis* defenses against TSSM. These data further indicate that  
131 MYC2,3,4 induce synthesis of additional *CYP79B2 CYP79B3*-independent *Arabidopsis* defense  
132 compounds that prominently contribute to *Arabidopsis* resistance to TSSM. The identity of these  
133

134 compounds is at present not known. Thus, upon TSSM herbivory, *Arabidopsis* plants induce  
135 synthesis of JA-regulated defense compounds against TSSM, including Trp-derived secondary  
136 metabolites and, *CYP79B2 CYP79B3*-independent molecules, Figure 1B.

137

### 138 **Mites can adapt to a complex array of *Arabidopsis* defenses**

139 Because of the complexity of *Arabidopsis* induced defenses against TSSM herbivory, how could a  
140 mite population adapted to a specific host plant switch to *Arabidopsis*? In an experimental  
141 evolutionary setup, the reference London strain, an ancestral TSSM population reared on bean  
142 and highly susceptible to *Arabidopsis* defenses (Zhurov et al., 2014), was transferred and  
143 continuously maintained on *Arabidopsis* plants for 18 months ( $\geq 25$  generations), Figure 2A. We  
144 initially infested *Arabidopsis* plants with approximately 1,000 fertilized female mites in a  
145 triplicated experiment on two *Arabidopsis* genotypes: a) Col-0 wild-type plants, and b) *cyp79b2*  
146 *cyp79b3* mutant plants that lack Trp-derived defenses but express the remaining of JA-regulated  
147 defenses, Figures 1B and 2A. The performance of the ancestral and selected mite populations  
148 was subsequently quantified by counting the number of eggs, larvae, nymphs and adults derived  
149 from 20 adult females in 7 days. Performance was measured in two experimental regimes: a)  
150 direct transfer, where the initial mites were moved from their corresponding rearing plant hosts  
151 directly to the experimental plants, and b) indirect transfer, that included mite maintenance on  
152 bean plants for two generations prior to their transfer to the experimental plants. The  
153 performance of the ancestral and selected mite populations on bean, or *Arabidopsis cyp79b2*  
154 *cyp79b3* and Col-0 plants had similar patterns in both direct (Supplemental Figure 1) and  
155 indirect (Figure 2B) transfer regimes, indicative of genetic adaptation that is independent of  
156 maternal and environmental physiological effects.

157 On bean plants, Figure 2B top, *Arabidopsis*-selected mite populations had slight but  
158 significantly lower performance relative to the ancestral population, indicating that TSSMs can  
159 evolve the ability to exploit different hosts without major reduction in their performance on the  
160 ancestral plants. On *cyp79b2 cyp79b3* plants, Figure 2B middle, *Arabidopsis*-selected mite  
161 populations performed significantly better than the ancestral population, suggesting that they  
162 are able to overcome *CYP79B2 CYP79B3*-independent *Arabidopsis* defenses to a similar extent.  
163 On Col-0 plants, Figure 2B bottom, only mites selected on Col-0 had increased performance over  
164 the ancestral population, showing that Col-0 selected mites were able to adapt to *CYP79B2*  
165 *CYP79B3*-dependent defenses. However, mites selected on *cyp79b2 cyp79b3* plants and the  
166 ancestral mite population that were not exposed to *CYP79B2 CYP79B3*-dependent *Arabidopsis*  
167 defenses were susceptible to these defenses and had similar and low performances when they  
168 fed on Col-0 plants.

169 We have arbitrarily chosen populations #3 of *cyp79b2 cyp79b3* and Col-0 selected mites  
170 for further studies that were performed in indirect transfer regimes. The analysis of additional  
171 mite fitness parameters, fecundity and *Arabidopsis* leaf damage caused by mite feeding (Figure  
172 2C and D, respectively) confirmed the adaptation status of these mite populations (from now on  
173 referred to as *cyp*-a (for #3 *cyp79b2 cyp79b3* selected mite population), Col-a (for #3 Col-0  
174 selected mite population) and bean-a (for the ancestral London TSSM population)). Thus, our  
175 data demonstrate that TSSM can adapt to novel plant hosts with a complex array of defenses.  
176 Moreover, mite adaptation to *CYP79B2 CYP79B3*-independent *Arabidopsis* defenses (present in  
177 both types of *Arabidopsis*-selected mite populations) can be uncoupled from mite adaptation to  
178 Trp-derived defenses (present only in mites selected on Col-0 plants).

179

180

181

182 ***Arabidopsis*-adapted mites do not suppress *Arabidopsis* defenses**

183 Suppression of induced plant defenses was proposed to be the common and most efficient  
184 mechanism of TSSM adaptation to new host plants (Jonckheere et al., 2016; Villarroel et al.,  
185 2016; Blaazer et al., 2018; Jonckheere et al., 2018). Indeed, interference with either JA-  
186 biosynthesis or its signalling appears to be an effective way to attenuate a whole range of  
187 *Arabidopsis* defense compounds that restrict TSSM herbivory (Figure 1). Furthermore, the  
188 ancestral London strain previously gave rise to tomato-adapted populations that, in the process,  
189 gained the ability to suppress tomato JA-regulated responses (Wybouw et al., 2015), indicating  
190 that London mites are able to evolve the defense suppression trait.

191 If *Arabidopsis*-adapted mites suppress *Arabidopsis* defenses, then it is expected that  
192 they elicit attenuated *Arabidopsis* responses relative to those triggered by the ancestral bean-a  
193 mites. The previous transcriptome and metabolome analysis of *Arabidopsis* responses to TSSM  
194 herbivory established that the expression of the *AOS*, *MYC2*, *CYP79B2* and *CYP79B3* genes  
195 (labeled in red in Figure 1B) and the abundance of JA, JA-Ile and indol-3-ylmethylglucosinolate  
196 (I3M) metabolites (labeled in green in Figure 1B) are reliable markers of *Arabidopsis* induced  
197 defenses, at 24 h following mite infestation (Zhurov et al., 2014). Thus, to investigate whether  
198 mite adaptation to *Arabidopsis* relies on the attenuation of JA-induced defenses, we determined  
199 the levels of defense marker transcripts (RT-qPCR) and metabolites (liquid chromatography–  
200 mass spectrometry, LC-MS) in Col-0 plants that were challenged with bean-a, *cyp-a* or Col-a  
201 mites, after 24 h of mite herbivory. Contrary to what would be expected if plant defenses were  
202 attenuated, *cyp-a* and Col-a mites induced all JA-regulated marker genes to similar or higher  
203 levels relative to non-adapted bean-a mites, Figure 3A. Likewise, JA, JA-Ile and I3M metabolites  
204 accumulated at comparable levels in bean-a, *cyp-a* and Col-a challenged Col-0 plants (Figure 3B),  
205 indicating that *Arabidopsis* defenses are augmented and not attenuated by mite adaptation. In  
206 addition, one of the hallmarks of defense-suppressing TSSM populations is the similarity of their  
207 performance on wild-type and defense-deficient host plants (Kant et al., 2008). However,  
208 *Arabidopsis*-adapted mites, like the ancestral population, performed better on *cyp79b2 cyp79b3*  
209 than on Col-0 plants, Figure 2C and D, indicating that *Arabidopsis*-adapted mites do not  
210 manipulate the onset of *Arabidopsis* defenses. Cumulatively, these data demonstrate that  
211 adaptation of mites to *Arabidopsis* is not based on the suppression of host defenses.

212  
213 ***Arabidopsis*-adapted mites are responsive to *Arabidopsis* xenobiotics**

214 Metabolic resistance is another mechanism of herbivore adaptation to xenobiotic challenges  
215 previously implicated in the evolution of TSSM resistance to pesticides (Van Leeuwen and  
216 Dermauw, 2016) and mite adaptation to several plant hosts (Agrawal et al., 2002; Wybouw et al.,  
217 2012; Wybouw et al., 2014; Wybouw et al., 2015). These previous studies established that  
218 constitutive overexpression and/or increased expression of genes encoding xenobiotic-  
219 metabolizing enzymes upon exposure to a novel host (transcriptional plasticity) are correlated  
220 with TSSM's increased detoxification potential and resistance to pesticides or host  
221 allelochemicals. Moreover, the requirement for rapid transcriptional plasticity has been  
222 demonstrated in the adaptation of the generalist *M. persicae* to a new host plant (Mathers et al.,  
223 2017).

224 We have previously identified forty genes, whose expression levels correlated with  
225 increasing levels of *Arabidopsis* defenses (Zhurov et al., 2014). They primarily encoded  
226 cytochrome P450 monooxygenases (P450s) and UDP-glycosyltransferase (UGTs) detoxifying  
227 enzymes. We have arbitrarily chosen three genes within each class (*CYP392A1*, *CYP392A16*,  
228 *CYP392D8*, *UGT201A2v2*, *UGT204B1* and *UGT204A5*) and tracked their expression (RT-qPCR) in  
229 bean-a, *cyp-a* and Col-a mites feeding on bean, *cyp79b2 cyp79b3* and Col-0 *Arabidopsis* plants.

230 On the ancestral bean plants, all marker transcripts were at similar low levels in both bean- and  
231 *Arabidopsis*-adapted mites, Figure 4, indicating that none of the tested genes underwent  
232 constitutive upregulation during mite adaptation to *Arabidopsis*. Consistent with the previous  
233 report (Zhurov et al., 2014), transfer of bean-a mites to *cyp79b2 cyp79b3* or Col-0 plants  
234 resulted in induced expression of all tested *CYP* and *UGT* genes. Their expression was also  
235 induced in *cyp-a* and Col-a mites when they were shifted from bean to *cyp79b2 cyp79b3* or Col-0  
236 plants. Even though there was variability in the relative expression of *CYP* and *UGT* genes in  
237 these mites, their levels were either comparable or lower than in bean-a mites, Figure 4. Thus,  
238 neither constitutive expression nor inducibility of tested *CYP* and *UGT* genes increased in  
239 *Arabidopsis*-adapted mites, demonstrating that: a) *Arabidopsis*-adapted mites retained  
240 responsiveness to *Arabidopsis* xenobiotics, and b) mite genes initially induced by the shift from  
241 bean to *Arabidopsis* plants do not associate with TSSM long-term adaptation to *Arabidopsis*.

242

### 243 **Metabolic resistance underlies TSSM adaptation to *Arabidopsis***

244 To identify changes in the detoxification potential associated with mite adaptation to  
245 *Arabidopsis*, we determined global enzymatic activity for three main protein families - esterases,  
246 glutathione-S-transferases (GSTs) and P450s - in ancestral and adapted mite populations upon  
247 feeding on bean and *Arabidopsis* plants. Overall, activities of all three enzymatic classes were  
248 responsive to the host plant challenge: they were lowest when mites fed on the ancestral bean  
249 plants and they progressively increased with the complexity of *Arabidopsis* defenses, Figure 5A,  
250 D and Supplemental Figure 2. However, of the three classes of detoxification enzymes, the  
251 detoxification potential of P450s is the only one that was associated with TSSM adaptation to  
252 *Arabidopsis*. P450 activity was consistently higher in Col-a mites across all plant hosts, indicating  
253 that both constitutive and inducible levels of P450 activity increased in Col-a mites, Figure 5D  
254 (three-way ANOVA; plant host: mite strain interaction  $F = 103.93$ ,  $p = 5.451e-16$ , followed by  
255 Tukey's HSD test,  $p < 0.01$ ,  $n = 4$ ).

256 To further test the requirement of esterase, GST and P450 activities for TSSM  
257 adaptation to *Arabidopsis*, we examined whether the separate enzymatic classes may be  
258 correlated with the mite's ability to use *Arabidopsis* as a host. If a particular class of enzymes is  
259 required for mite adaptation to *Arabidopsis*, then the reduction of its activity is expected to  
260 restore the susceptibility of *Arabidopsis*-adapted mites to *Arabidopsis* defense compounds. We  
261 used S,S,S tributyl-phosphorotrithioate (DEF, an inhibitor of esterase activity), diethyl maleate  
262 (DEM, an inhibitor of GST activity), and piperonyl butoxide (PBO) and trichlorophenylpropynyl  
263 ether (TCPPE) (inhibitors of P450 activity) to inhibit the activity of the indicated enzymatic  
264 classes. In preliminary experiments, concentrations of 2000 mg/L (DEF), 100 mg/L (DEM), 1000  
265 mg/L (PBO), and 1500 mg/L (TCPPE) were identified as sublethal but nevertheless capable of  
266 significantly reducing the matching enzymes in Col-a mites feeding on Col-0 plants, Figure 5B, E  
267 and G, and Supplemental Figure 2. Note that inhibitors do not affect all enzymes equally within  
268 the targeted enzymatic class (Feyereisen, 2014). Therefore, the lack of inhibitory effect on mite  
269 performance is not a strong evidence against the involvement of a particular enzymatic class in  
270 mite host adaptation. Conversely, the significant decrease of mite performance on a new host  
271 plant upon the application of a given inhibitor strongly supports the requirement of enzyme(s)  
272 within the matching class for mite host adaptation.

273 The application of DEF reduced esterase activities by 32% but had no effect on the  
274 fitness of Col-a mites when feeding on either Col-0 or *cyp79b2 cyp79b3* plants, Supplemental  
275 Figure 2, indicating that esterases may not be required for mite adaptation to *Arabidopsis*. The  
276 application of DEM decreased the GST enzymatic activity by 43%, Figure 5B. Inhibition of GST  
277 activity had a minor but significant effect on the fecundity of Col-a mites, suggesting that GST

278 activity is required for the high Col-a performance on *Arabidopsis*, Figure 5C. Isothiocyanates are  
279 the major *Arabidopsis* anti-herbivore defense compounds that are detoxified by GSTs in many  
280 generalist caterpillars (Wadleigh and Yu, 1988; Schramm et al., 2012; Jeschke et al., 2016) and  
281 leaf mining drosophilids (Gloss et al., 2014). However, isothiocyanates are toxic breakdown  
282 products of aliphatic glucosinolates, shown to be ineffective against *T. urticae* (Zhurov et al.,  
283 2014). Isothiocyanates from Trp-derived indole glucosinolates, a glucosinolate class proposed to  
284 be toxic to *T. urticae* (Zhurov et al., 2014), are unstable and are converted to alternative  
285 products (Wittstock and Burow, 2010). Whether some of these alternative products confer  
286 toxicity against *T. urticae* and are one of the potential substrates for adaptation-associated GSTs  
287 remains to be determined.

288 While esterase and GST inhibitors had no or little effect on TSSM fecundity and fitness,  
289 the application of PBO significantly reduced the P450 activity (25%) and dramatically reduced  
290 (44%) the fecundity of Col-a mites feeding on Col-a host plants, Figure 5E and F. Since the PBO  
291 does not interfere with all P450s equally and also inhibits esterases in some arthropods  
292 (Feyereisen, 2014), we applied another structurally unrelated P450 inhibitor, TCPPE, to confirm  
293 that the observed effects were due to the decreased P450 activity. TCPPE, like PBO, significantly  
294 inhibited P450 enzyme activity in Col-a mites (13%), Figure 5G. It dramatically reduced the  
295 fecundity of Col-a mites when they fed on Col-0 (39%) and *cyp79b2 cyp79b3* plants (33%), Figure  
296 5H, suggesting that P450 activity is required for the ability of Col-a mites to counteract  
297 *Arabidopsis* defenses.

298

#### 299 **P450 activity is required for TSSM adaptation to *Arabidopsis***

300 As P450 inhibitors were applied directly to *Arabidopsis* leaves, there is a possibility that  
301 PBO/TCPPE perturbed *Arabidopsis* defense physiology and only secondarily affected mite  
302 fecundity. For example, the synthesis of JA metabolites (Heitz et al., 2012; Aubert et al., 2015;  
303 Widemann et al., 2015) and Trp-derived secondary metabolites (Hull et al., 2000) occur via  
304 pathways that include many plant P450s. Therefore, to further dissect the requirement of mite  
305 P450s in TSSM adaptation to *Arabidopsis*, we took advantage of recently validated RNAi gene  
306 silencing protocol in TSSM (Suzuki et al., 2017) to silence P450 pathway.

307 Because the *CYP* gene family is very large in TSSM, it is difficult to characterize the  
308 involvement of P450s in mite adaptation to *Arabidopsis* using RNAi (Grbic et al., 2011). To  
309 circumvent this hurdle, we instead silenced the expression of *NADPH-cytochrome P450*  
310 *reductase* (*Tu-CPR*), a co-enzyme required for the catalytic reactions carried out by microsomal  
311 P450s (Masters and Okita, 1980). *Tu-CPR* is a single gene in the TSSM genome encoded by the  
312 *tetur18g03390* locus (Grbic et al., 2011). It is constitutively expressed in all tissues of adult  
313 spider mites, including the midgut epithelial and digestive cells where digestion and  
314 detoxification of dietary xenobiotics are expected to take place (Bensoussan et al., 2018), Figure  
315 6A. Application of dsRNA-*Tu-CPR* to Col-a mites resulted in decreased expression of *Tu-CPR*,  
316 Figure 6B. Consistent with the *Tu-CPR* function as an essential component of the P450 enzyme  
317 complex, the P450 activity was reduced by 38% in the *Tu-CPR* silenced mites relative to mites  
318 exposed to dsRNA-NC (the negative control, dsRNA-NC, is homologous to a non-transcribed  
319 genomic region, see Supplemental Table 1 and (Suzuki et al., 2017)), Figure 6C. Strikingly, the  
320 silencing of *Tu-CPR* reduced the fecundity of Col-a mites by almost 50% when they were  
321 challenged on the *Arabidopsis* host, but had no effect when they infested bean, Figure 6D.  
322 Similar phenotypes were obtained upon the application of a second, independent, dsRNA-*Tu-*  
323 *CPR-1* fragment, Supplemental Figure 3, confirming the specificity of the observed phenotypes  
324 to a loss of *Tu-CPR* function and the requirement of P450 activity for the adaptation of Col-a  
325 mites to *Arabidopsis*.



326

327

328 The RNAi reverse genetics approach combined with the application of P450 inhibitors  
329 identified several features of P450 activity. First, the reduced P450 activity, through the  
330 application of P450 inhibitors or dsRNA-*Tu-CPR*, did not affect TSSM fecundity when mites fed  
331 on bean plants - an ancestral host (Figure 5H and 6D, and Supplemental Figure 3), suggesting  
332 that P450 activity is specifically required for mites' ability to use *Arabidopsis* as a host. Second,  
333 the experimental treatments reduced global P450 activity but did not eliminate it, Figures 5E, 5G  
334 and 6C. Despite the incomplete inhibition of P450 activity, the fitness advantage of Col-a mites  
335 over the ancestral population on Col-0 plants was almost completely abolished (Figures 5F, 5H  
336 6D and Supplemental Figure 2), demonstrating that P450 activity is the main contributor to  
337 TSSM adaptation to *Arabidopsis*. Third, P450 inhibitors had a limited but significant effect on the  
338 fecundity of bean-a ancestral TSSM population when these mites were challenged on the  
339 *Arabidopsis* host (Figures 5F and H). As bean-a mites had no prior exposure to *Arabidopsis* plants,  
340 the effect of P450 inhibitors on their fecundity uncovers the limited contribution of initially  
341 induced P450s to mite fitness on *Arabidopsis*. Since, *Arabidopsis*-adapted mites retained  
342 responsiveness to shift from bean to *Arabidopsis* plants, Figure 4, it is expected that these P450s  
343 also contribute to the resistance of *Arabidopsis*-adapted mites to *Arabidopsis* defenses. Fourth,  
344 the reduced P450 activity profoundly affected the fecundity of Col-a mites when exposed to  
345 *Arabidopsis* defenses (Figures 5F and H, and Supplemental Figure 2), indicating that Col-a mites  
346 acquired highly efficient P450 enzymatic catalytic activity(ies) against *Arabidopsis* defenses  
347 during the adaptation process. At least some of these P450 proteins should be encoded by *CYP*  
348 genes with increased basal expression, as increased P450 activity was detected in bean-fed Col-a  
349 mites, Figure 5D. Fifth, inhibition of P450 activity affected Col-a mite fecundity when they fed on  
350 both Col-0 and *cyp79b2 cyp79b3* plants, Figures 5F and H. This indicates that P450s function to  
351 counter *CYP79B2 CYP79B3*-independent defenses, shown to be major contributors to  
352 deterrence of TSSM herbivory, Figure 1.

352

353 In summary, we provided robust *in vivo* functional data proving that P450 activity is  
354 required for *T. urticae* adaptation to the *Arabidopsis* host plant. In an unbiased analysis, we  
355 identified two distinct modes of P450 activities, Figures 4-6. One corresponds to the early  
356 responsive *CYP* genes that are induced in both ancestral and *Arabidopsis*-adapted mites upon  
357 exposure to *Arabidopsis*. These *CYPs* enable limited adaptation to *Arabidopsis* defenses ((Zhurov  
358 et al., 2014) and this study). This is consistent with the canonical detoxification mechanism in  
359 generalist herbivores associated with physiological acclimation whereby the exposure to  
360 xenobiotics results in the transcriptional induction of genes encoding enzymes capable of  
361 metabolizing these defense compounds (Li et al., 2004; Sasabe et al., 2004; Mathers et al., 2017;  
362 Shi et al., 2018). Typically, such enzymes recognize a wide range of substrates and have low  
363 enzymatic catalytic activity, resulting in a limited contribution to the detoxification of plant  
364 defense compounds. The other more significant contribution of P450-mediated metabolic  
365 resistance is realized through the action of adaptation-associated P450s (Figures 5, 6 and  
366 Supplemental Figure 3). This pattern of metabolic counteraction is reminiscent of strategies  
367 deployed by host-specialised herbivores, in which host-adaptation associates with mutations  
368 that enhance the enzyme activity (Li et al., 2007; Schuler, 2011) or with the overexpression of  
369 detoxification genes (Bass et al., 2013). Therefore, we interpret the adaptation of TSSM  
370 populations to *Arabidopsis* as a combination of metabolic resistances characteristic of both  
371 generalist and specialist herbivores. Remarkably, the host-shift in TSSM occurs within an  
372 ecological timeframe, over 25 generations, enabling individual TSSM populations to expand its  
373 host range without losing the ability of feeding on the ancestral host.

373

## 374 **Conclusion**

375 The innate ability to perceive and respond to plant defenses in a process of physiological  
376 acclimation is assumed to enable generalist herbivores to utilize a wide range of host plants. On  
377 the other hand, genetic adaptation, occurring over long evolutionary time scales, is presumed to  
378 enable specialist herbivores to evolve novel adaptation traits that efficiently counteract  
379 defenses of a narrow range of host plants (Despres et al., 2007; Barrett and Heil, 2012; Heidel-  
380 Fischer and Vogel, 2015). *T. urticae* is an extreme generalist that acclimates, like other  
381 polyphagous herbivores, to host shift by reprogramming its salivary and detoxification  
382 complements (Figure 4 and (Dermauw et al., 2013; Zhurov et al., 2014; Wybouw et al., 2015;  
383 Jonckheere et al., 2016; Villarroel et al., 2016; Jonckheere et al., 2018)). However, prolonged  
384 exposure (over generations) to initially unfavorable host plants enables *T. urticae* to dramatically  
385 increase its performance (Figure 2 and (Gould, 1979; Fry, 1989; Magalhaes et al., 2007; Wybouw  
386 et al., 2015)). As demonstrated here for the *Arabidopsis*-adapted mite populations, these mites  
387 undergo genetic adaptation to a complex mixture of defenses presented by the new host plant.

388 Even though suppression of plant defenses has been proposed to be the prevailing  
389 mechanism of adaptation for generalist herbivores (Jonckheere et al., 2016; Villarroel et al.,  
390 2016; Blaazer et al., 2018; Jonckheere et al., 2018), our data show that neither *cyp-a* nor *Col-a*  
391 mite populations attenuate *Arabidopsis* JA-induced defenses. Instead, we provide multiple  
392 independent lines of evidence indicating that *Arabidopsis*-adapted mites evolve metabolic  
393 resistances characteristic of both generalist and specialist herbivores. Notably, these adaptation  
394 mechanisms unfolded over approximately 25 generations, indicating that *T. urticae* has the  
395 ability to reset its interaction with the host plant extremely rapidly.

396 The genomic repertoire of detoxification genes in TSSM could be the versatile toolkit  
397 enabling that generalist mite to respond to a wide range of plant defenses. If it is so, the  
398 comparative genome and transcriptome analysis of *Arabidopsis*-adapted and ancestral TSSM  
399 populations may identify genes within the P450 family that are required for host adaptation to  
400 *Arabidopsis* and reveal if adaptation-associated P450 activity is achieved by altering gene  
401 regulation, copy number or through specific mutation(s). Whether the long-term genetic  
402 adaptation to the new host described in this study is exclusive to *T. urticae* or is widespread  
403 among generalist herbivores remains unknown. However, understanding the mechanisms  
404 involved in generalist adaptation is highly relevant in the context of anthropogenic  
405 environmental alterations characterized by habitat fragmentation and loss, climate change and  
406 invasion of alien species. These changes are reshaping ecological communities and ecological  
407 interactions, and are expected to promote the proliferation of generalist species (DeLucia et al.,  
408 2012; Stireman and Singer, 2018).

409

## 410 **Materials and methods**

### 411 **Plant growing and mite rearing conditions**

412 Columbia-0 (Col-0) seeds were obtained from the Arabidopsis Biological Resource Center (ABRC,  
413 Ohio State University), *cyp79b2 cyp79b3* from B. A. Halkier (University of Copenhagen,  
414 Denmark), *myc2 myc3 myc4*, from R. Solano (Universidad Autónoma de Madrid) and bean  
415 (*Phaseolus vulgaris*, cultivar California Red Kidney) from Stokes, Thorold, Ontario, Canada.  
416 *Arabidopsis* plants were grown under 100 to 150  $\mu\text{mol m}^{-2} \text{sec}^{-1}$  cool-white fluorescent light at  
417 24°C with a 10-h/14-h (light/dark) photoperiod in controlled growth chambers. The two spotted  
418 spider mites (*Tetranychus urticae*), London reference strain (Grbic et al., 2011), were reared on  
419 bean plants in growth chambers at 24°C, 60% relative humidity, and with a 16-h/8-h (light/dark)  
420 photoperiod for more than 100 generations.

421

## 422 **Experimental evolution**

423 The London strain, reared on bean plants over the last ten years (referred to as bean-a strain), is  
424 an ancestral line used in the experimental evolution. Three independent selection lines were  
425 generated by transferring approximately 1,000 randomly chosen adult bean-a females to 3-  
426 week-old *cyp79b2 cyp79b3* or Col-0 *Arabidopsis* plants that were replaced biweekly. Mite  
427 populations were allowed to propagate for at least 25 generations, generating six selected lines:  
428 three independent lines selected on *cyp79b2 cyp79b3* plants, referred to as *cyp*-a lines (#1-#3),  
429 and three independent lines selected on Col-0 plants, referred to as Col-a lines (#1-#3). Selected  
430 lines were subsequently continuously reared on their corresponding plant hosts. *cyp*-a line (#3)  
431 and Col-a line (#3) were used for the follow-up experiments.

432

## 433 **Mite performance analysis**

434 Twenty 3-day-old adult female mites were transferred to each of the experimental plants (bean,  
435 *cyp79b2 cyp79b3* and Col-0) to be evaluated for their performance. Mite performance was  
436 measured as total population size seven days post inoculation in direct (mites were moved  
437 directly from their rearing hosts to experimental plants) and indirect (mites were reared on  
438 bean plants for two generations prior to their transfer to the experimental plants) transfer  
439 regimes. The experiment was performed in four biological replicates for each selected line.  
440 Differences between selected line population sizes were determined using a one-way ANOVA,  
441 followed by Tukey's honestly significant difference (HSD) test. All other experiments were  
442 performed with mites that were propagated for two generations on bean plants.

443

## 444 **Plant damage analysis**

445 Leaf damage of *cyp79b2 cyp79b3* and Col-0 *Arabidopsis* plants upon feeding of bean-a, *cyp*-a  
446 and Col-a mite strains was performed as previously described (Zhurov et al., 2014). Briefly, ten  
447 adult female mites were placed on the rosette of *Arabidopsis* plants and allowed to feed for 3  
448 days before plants were cut at the base of the rosette. The adaxial side of the rosette was  
449 scanned using a Canon® CanoScan 8600F model scanner (Canon U.S.A. Inc., Melville, NY, U.S.A)  
450 at a resolution of 1200 dpi and a brightness setting of +25. Scanned plants were saved as .jpg  
451 files for subsequent analysis in Adobe Photoshop 5 (Adobe Systems, San Jose, CA) as previously  
452 described. The experiment was performed using 6 biological replicates/trial, and in three  
453 experimental trials. Differences in plant damage between mite strains on different hosts were  
454 determined using a three-way ANOVA, using mite strain, plant host and experimental replication  
455 as main effects, including interaction terms, followed by Tukey's honestly significant difference  
456 (HSD) test. There was a lack of interaction between experimental trials and other main effects,  
457 so data across trials were combined for increased statistical power by use of the three-way  
458 ANOVA (Brady et al., 2015).

459

## 460 **Mite fecundity assay**

461 Fecundity of bean-a strain on Col-0, *cyp79b2 cyp79b3* and *myc2 myc3 myc4* as well as bean-a,  
462 *cyp*-a and Col-a strains when feeding on *cyp79b2 cyp79b3* or Col-0 *Arabidopsis* plants were  
463 performed on detached leaves. Briefly, a petiole of a detached fully-elongated adult leaf was  
464 mounted through the parafilm into a small petri plate filled with water. The detached leaf was  
465 infested with a single 3-day-old adult female mite whose fecundity was monitored over two or  
466 six days. A vented lid was placed on-top of the set up to ensure the mite containment.  
467 Inoculated leaves were kept under standard mite rearing conditions and were replaced every  
468 second day in the case of 6-day period. The experiment included five to ten biological replicates  
469 for each treatment that were repeated in three experimental trials. Differences in fecundity

470 between mite strains on different hosts were determined using a three-way ANOVA, using mite  
471 strain, plant host and experimental trial as main effects, including interaction terms, followed by  
472 Tukey's honestly significant difference (HSD) test. There was a lack of interaction between  
473 experimental trials and other main effects, so data across trials were combined for increased  
474 statistical power (Brady et al., 2015). For mite fecundity assay on MeJA-treated Col-0 leaves, the  
475 rosette leaves from five-week-old Col-0 plants were sprayed 3 times within 24 h with methyl  
476 jasmonate (MeJA) (Sigma-Aldrich, Cat # 392707, 500  $\mu$ M in ethanol 0.4 % (v/v)), or with ethanol  
477 0.4 % (v/v). Subsequently, fully-elongated adult leaves were cut and each petiole was inserted in  
478 a PCR tube containing 340  $\mu$ L of 0.5 mg/mL L-Tryptophan (Sigma-Aldrich, Cat # T0254).  
479 Detached leaves were sprayed 3 times within 24 h with MeJA or ethanol 0.4 % solution and  
480 were transferred in new PCR tubes containing fresh tryptophan solution. Each detached leaf was  
481 then infested with 10 adult female mites (London strain) that were starved overnight. The  
482 number of eggs were recorded 24 h after mite addition. The experiment included nine biological  
483 replicates and was repeated in two experimental trials. Differences in fecundity were detected  
484 by a two-way ANOVA, using treatment and experimental trials as main effects including an  
485 interaction term. There was a lack of interaction between experimental trials and treatment, so  
486 data across trials were combined for increased statistical power (Brady et al., 2015).

487

#### 488 **Real-Time Quantitative Reverse Transcription-PCR Analysis**

489 For plant marker gene analysis, bean-a, *cyp-a* and Col-a mite strains were collected from their  
490 rearing hosts and were propagated for two generations on bean plants after which their  
491 corresponding 3-day-old adult female mites were transferred to Col-0 plants. Mites were  
492 allowed to feed for 24 h, after which leaves were collected and immediately frozen in liquid  
493 nitrogen. These samples were used for the plant marker gene/metabolite analysis. Experiment  
494 was replicated in three biological replicates/trial and in three independent trials. For TSSM  
495 marker gene analysis, bean-a, *cyp-a* and Col-a mite strains were collected from their rearing  
496 hosts and were propagated for two generations on bean plants after which their corresponding  
497 3-day-old adult female mites were transferred to bean, *cyp79b2 cyp79b3* or Col-0 plants for 24 h.  
498 Samples of 100 mites were collected and immediately frozen in liquid nitrogen. The experiment  
499 was replicated in three biological replicates/trial and in three independent trials. Preparation of  
500 RNA, cDNA and the real-time quantitative reverse transcription-PCR analysis was performed as  
501 previously described (Zhurov et al., 2014). Primer sequences and amplification efficiencies (E)  
502 used in qPCR are shown in Supplemental Table 1. *PEROXIN4 (AT5G25760)*, was used as the  
503 reference gene for *Arabidopsis* genes and the expression of *RP49 (tetur18g03590)* was used as  
504 the reference for mite genes. Ct values of three technical replicates were averaged to generate a  
505 biological replicate Ct value. For plotting, an expression values for each target gene (T) was  
506 normalized to the reference gene (R). Normalized relative quantity (NRQ) was calculated as  
507  $NRQ = (1 + ER)^{CtR} / (1 + ET)^{CtT}$ . NRQs were Log<sub>2</sub>-transformed for statistical analysis. Mite marker gene  
508 data were analyzed by a two-way ANOVA with mite strain and plant host as main effects  
509 including an interaction term, followed by Tukey's honestly significant difference (HSD) test  
510 (Rieu and Powers, 2009). For plant marker gene analysis, the data were analysed by a two-way  
511 ANOVA, using mite strain and experimental trial as main effects including an interaction term,  
512 followed by Tukey's honestly significant difference (HSD) test. There was a lack of interaction  
513 between experimental trial and mite strain, so data across trials were combined for increased  
514 statistical power (Brady et al., 2015). For graphical representation of the expression of plant  
515 marker genes, the NRQ data were further normalized to the 'no mite' control sample, which was  
516 therefore set to one. Thus, these results represent fold change differences in the expression of  
517 marker genes relative to 'no mite' control.

## 518 **Metabolic Analysis**

519 Plant material used for the RNA isolation toward the expression analysis of the plant marker  
520 genes was utilized for the quantification of plant metabolites (JA, JA-Ile and I3M) as described in  
521 Zhurov et al., 2014. Differences in metabolite levels were detected by a two-way ANOVA, using  
522 mite strain and experimental trial as main effects including an interaction term, followed by  
523 Tukey's honestly significant difference (HSD) test. There was a lack of interaction between  
524 experimental trial and mite strain, so data across trials were combined for increased statistical  
525 power (Brady et al., 2015).

526

## 527 **Determination of cytochrome P450 monooxygenase (P450), esterase and glutathione-S-** 528 **transferase (GST) activity**

529 To perform the enzymatic activity assays, 3-day-old spider mite females of each Col-a, *cyp-a* and  
530 bean-a strains, reared for two generations on bean plants, were placed on bean, *cyp79b2*  
531 *cyp79b3* or Col-0 plants. After 24 h, 200 females from each treatment were collected and  
532 immediately frozen, to be used for protein extraction and enzymatic assays. Mites were  
533 homogenized in 100 mM phosphate buffer, pH 7.6. The concentration of total protein mite  
534 extracts was determined using the Quick Start™ Bradford Protein Assay (Quick start Bradford 1x  
535 dye reagent, Bio-Rad, Cat# 500-0205), with Bovine Serum Albumin (Sigma-Aldrich, Cat # A7906)  
536 as the standard. Twenty, 10 and 10 µg of protein per reaction were used for measuring  
537 enzymatic activity of glutathione-S-transferases (GSTs), P450 monooxygenases, and esterases,  
538 respectively. The enzymatic activities were assessed spectrophotometrically using 1-chloro-2,4-  
539 dinitrobenzene (CDNB) (for GSTs) (Habig and Jakoby, 1981), 7-ethoxy-4-trifluoromethylcoumarin  
540 (7-EFC) (for P450s) (Buters et al., 1993), and 4-nitrophenyl acetate (pNPA) (for esterases) (Park  
541 et al., 1961), as substrates. Enzymatic activities were determined in four independent samples  
542 with three technical replicates per sample. Differences in enzymatic activity between mite  
543 strains on different plant hosts were detected using a two-way ANOVA, with mite strain and  
544 plant host as main effects including an interaction term, followed by Tukey's honestly significant  
545 difference (HSD) test.

546

## 547 **Application of enzyme inhibitors**

548 Diethyl maleate (DEM, an inhibitor of glutathione S-transferase (GST) activity), S,S,S tributyl-  
549 phosphorotrithioate (DEF, an inhibitor of esterase activity), and piperonyl butoxide (PBO) and  
550 trichlorophenylpropynyl ether (TCPPE) (inhibitors of P450 activities) were dissolved in acetone  
551 (1:1 by volume) and were subsequently diluted with distilled water to reach desired  
552 concentrations. A range of concentrations of DEM (100, 200, 500, 1000 and 2000 mg/L), DEF (10,  
553 20, 100, 200 and 500 mg/L), PBO (30, 100, 500, 1000 and 2000 mg/L) and TCPPE (1500 and 2000  
554 mg/L) were tested to identify highest sublethal inhibitor concentration (mortality below 10%).  
555 Briefly, a batch of five detached bean leaves was sprayed either with a solution containing an  
556 inhibitor or a mock solution to the point of run-off. Fifty 1-2-day-old adult bean-a female mites  
557 were transferred to the upper (adaxial) side of a treated bean leaf that was placed on wet  
558 cotton wool. After 24 h, the number of surviving mites was recorded and mortality was  
559 calculated using Abbott's formula (Abbott, 1925).

560

561 For inhibitor bioassays, detached leaves of Col-0 *Arabidopsis* plants were dipped in a solution  
562 containing one of the inhibitors (DEF, DEM, PBO, TCPPE) or water and acetone only as control.  
563 Upon drying, leaves were infested with 1-2-day-old adult female mites. For fecundity assays,  
564 one adult bean-a or Col-a female was placed on the leaf and the number of eggs laid by each  
565 female per day was recorded for six days. Treated Col-0 leaves were replaced every other day.

566 Fecundity was determined in three independent experimental trials with ten replicates per trial.  
567 For enzymatic assays, each Col-0 leaf was infested with ten 1 to 2-day-old adults Col-a female  
568 mites. After 24 h, a pool of 100 spider mites was used to measure GST, esterase and P450  
569 activities in DEM-, DEF-, PBO- and TCPPE-treated spider mites, respectively, using the protocol  
570 described above. Enzymatic activities were determined in five independent samples with three  
571 technical replicates per sample. Differences between means of fecundity and enzymatic  
572 activities of control and inhibitor-treated samples were calculated using unpaired Student's t  
573 tests (following tests for equal variance).

574

#### 575 ***In situ* hybridization**

576 DIG-labelled probes were produced and the whole mount *in situ* hybridization was performed  
577 according to previously published methods (Dearden et al., 2002). Images were collected using a  
578 Zeiss AxioCam HRc 412-312 camera mounted on a Zeiss Axioplan II microscope.

579

#### 580 **RNAi of *Tu-CPR***

581 Two non-overlapping fragments (*Tu-CPR*, 645 nt) and (*Tu-CPR-F1*, 564 nt), complementary to the  
582 coding region of *Tu-CPR* (*tetur18g03390*) and dsRNA complementary to a 382 bp non-  
583 transcribed intergenic fragment spanning the region 1690614±1690995 of the genomic scaffold  
584 12 (a negative control dsRNA, referred to as NC) were synthesized using primers listed in  
585 Supplementary Table 1 according to previously described protocol (Suzuki et al., 2017). A BLAST  
586 search against the *T. urticae* genome confirmed that dsRNA sequences are unique. dsRNA  
587 solutions at concentrations of 500 ng/μL were supplemented with 6% (v/v) blue dye  
588 erioglaucine (McCormick, Sparks Glencoe, MD). Newly molted adult female mites were soaked  
589 in dsRNA/dye solutions at 20°C for 24 h (Suzuki et al., 2017). Post soaking, mites with visible blue  
590 dye in posterior midgut were selected and were transferred in batches of 10 to either detached  
591 Col-0 leaves or bean leaf disks. Fecundity was determined in three independent experimental  
592 trials with ten replicates/trial as number of eggs deposited by individual female mite on 3<sup>rd</sup> and  
593 4<sup>th</sup> day post soaking. Mites used for the analysis of *CPR* expression levels were further selected  
594 on the basis of visual phenotype (spotless). The RT-qPCR was performed in eight (for dsRNA-*CPR*)  
595 and three (for dsRNA-*CPR-1*) experimental replicas, as described above. P450 activity in *CPR*  
596 silenced mites was determined in five independent samples with three technical replicates per  
597 sample, as described above. Differences in fecundity between dsRNA treated mites was  
598 detected using a two-way ANOVA, with mite treatment and experimental trial as main effects  
599 including an interaction term, followed by Tukey's honestly significant difference (HSD) test.  
600 There was a lack of interaction between experimental trial and mite treatment, so data across  
601 trials were combined for increased statistical power (Brady et al., 2015). Enzyme activity and RT-  
602 qPCR expression levels were compared between dsRNA treated mites using unpaired Student's t  
603 tests (following tests for equal variance).

604

#### 605 **Acknowledgments**

606 The authors would like to thank Drs. Thomas Van Leeuwen and Rene Feyereisen for their  
607 constructive comments on pharmacological experiments, and Pierre Hilson for critical  
608 comments on the manuscript. This work was supported by the Government of Canada through  
609 the Ontario Research Fund (RE08-067) and the Natural Sciences and Engineering Research  
610 Council of Canada (NSERC) awarded to MG and VG.

611

612 **References**

- 613 Abbott, W.S. (1925). A method of computing the effectiveness of an insecticide. *Journal of*  
614 *Economic Entomology* 18, 265-267. DOI: 10.1093/jee/18.2.265a.
- 615 Agrawal, A.A., Vala, F., and Sabelis, M.W. (2002). Induction of preference and performance after  
616 acclimation to novel hosts in a phytophagous spider mite: adaptive plasticity? *American*  
617 *Naturalist* 159(5), 553-565. DOI: 10.1086/339463.
- 618 Aubert, Y., Widemann, E., Miesch, L., Pinot, F., and Heitz, T. (2015). CYP94-mediated jasmonoyl-  
619 isoleucine hormone oxidation shapes jasmonate profiles and attenuates defence  
620 responses to *Botrytis cinerea* infection. *Journal of Experimental Botany* 66(13), 3879-  
621 3892. DOI: 10.1093/jxb/erv190.
- 622 Barrett, L.G., and Heil, M. (2012). Unifying concepts and mechanisms in the specificity of plant-  
623 enemy interactions. *Trends in Plant Science* 17(5), 282-292. DOI:  
624 10.1016/j.tplants.2012.02.009.
- 625 Bass, C., Zimmer, C.T., Riveron, J.M., Wilding, C.S., Wondji, C.S., Kausmann, M., et al. (2013).  
626 Gene amplification and microsatellite polymorphism underlie a recent insect host shift.  
627 *Proceedings of the National Academy of Sciences* 110(48), 19460-19465. DOI:  
628 10.1073/pnas.1314122110.
- 629 Basu, S., Varsani, S., and Louis, J. (2018). Altering plant defenses: Herbivore-associated  
630 molecular patterns and effector arsenal of chewing herbivores. *Molecular Plant-Microbe*  
631 *Interactions* 31(1), 13-21. DOI: 10.1094/mpmi-07-17-0183-fi.
- 632 Bednarek, P. (2012). Chemical warfare or modulators of defence responses - the function of  
633 secondary metabolites in plant immunity. *Current Opinion in Plant Biology* 15(4), 407-  
634 414. DOI: 10.1016/j.pbi.2012.03.002.
- 635 Bensoussan, N., Zhurov, V., Yamakawa, S., O'Neil, C.H., Suzuki, T., Grbic, M., et al. (2018). The  
636 digestive system of the two-spotted spider mite, *Tetranychus urticae* Koch, in the  
637 context of the mite-plant interaction. *Frontiers in Plant Science* 9, 1206. DOI:  
638 10.3389/fpls.2018.01206.
- 639 Beran, F., Sporer, T., Paetz, C., Ahn, S.J., Betzin, F., Kunert, G., et al. (2018). One pathway is not  
640 enough: The cabbage stem flea beetle *Psylliodes chrysocephala* uses multiple strategies  
641 to overcome the glucosinolate-myrosinase defense in its host plants. *Frontiers in Plant*  
642 *Science* 9, 1754. DOI: 10.3389/fpls.2018.01754.
- 643 Blaazer, C.J.H., Villacis-Perez, E.A., Chafi, R., Van Leeuwen, T., Kant, M.R., and Schimmel, B.C.J.  
644 (2018). Why do herbivorous mites suppress plant defenses? *Frontiers in Plant Science* 9,  
645 1057. DOI: 10.3389/fpls.2018.01057.
- 646 Brady, S.M., Burow, M., Busch, W., Carlborg, O., Denby, K.J., Glazebrook, J., et al. (2015).  
647 Reassess the *t* test: Interact with all your data via ANOVA. *Plant Cell* 27(8), 2088-2094.  
648 DOI: 10.1105/tpc.15.00238.
- 649 Buters, J.T., Schiller, C.D., and Chou, R.C. (1993). A highly sensitive tool for the assay of  
650 cytochrome P450 enzyme activity in rat, dog and man. Direct fluorescence monitoring of  
651 the deethylation of 7-ethoxy-4-trifluoromethylcoumarin. *Biochemical Pharmacology*  
652 46(9), 1577-1584. DOI: 10.1016/0006-2952(93)90326-r.
- 653 Dearden, P.K., Donly, C., and Grbic, M. (2002). Expression of pair-rule gene homologues in a  
654 chelicerate: early patterning of the two-spotted spider mite *Tetranychus urticae*.  
655 *Development* 129(23), 5461-5472. DOI: 10.1242/dev.00099.
- 656 DeLucia, E.H., Nability, P.D., Zavala, J.A., and Berenbaum, M.R. (2012). Climate change: Resetting  
657 plant-insect interactions. *Plant Physiology* 160(4), 1677-1685. DOI:  
658 10.1104/pp.112.204750.

- 659 Dermauw, W., Wybouw, N., Rombauts, S., Menten, B., Vontas, J., Grbic, M., et al. (2013). A link  
660 between host plant adaptation and pesticide resistance in the polyphagous spider mite  
661 *Tetranychus urticae*. *Proceedings of the National Academy of Sciences* 110(2), E113-122.  
662 DOI: 10.1073/pnas.1213214110.
- 663 Despres, L., David, J.P., and Gallet, C. (2007). The evolutionary ecology of insect resistance to  
664 plant chemicals. *Trends in Ecology & Evolution* 22(6), 298-307. DOI:  
665 10.1016/j.tree.2007.02.010.
- 666 Devoto, A., Ellis, C., Magusin, A., Chang, H.S., Chilcott, C., Zhu, T., et al. (2005). Expression  
667 profiling reveals COI1 to be a key regulator of genes involved in wound- and methyl  
668 jasmonate-induced secondary metabolism, defence, and hormone interactions. *Plant*  
669 *Molecular Biology* 58(4), 497-513. DOI: 10.1007/s11103-005-7306-5.
- 670 Dobler, S., Dalla, S., Wagschal, V., and Agrawal, A.A. (2012). Community-wide convergent  
671 evolution in insect adaptation to toxic cardenolides by substitutions in the Na,K-ATPase.  
672 *Proceedings of the National Academy of Sciences* 109(32), 13040-13045. DOI:  
673 10.1073/pnas.1202111109.
- 674 Elbaz, M., Halon, E., Malka, O., Malitsky, S., Blum, E., Aharoni, A., et al. (2012). Asymmetric  
675 adaptation to indolic and aliphatic glucosinolates in the B and Q sibling species of  
676 *Bemisia tabaci* (Hemiptera: Aleyrodidae). *Molecular Ecology* 21(18), 4533-4546. DOI:  
677 10.1111/j.1365-294X.2012.05713.x.
- 678 Fernandez-Calvo, P., Chini, A., Fernandez-Barbero, G., Chico, J.M., Gimenez-Ibanez, S., Geerinck,  
679 J., et al. (2011). The *Arabidopsis* bHLH transcription factors MYC3 and MYC4 are targets  
680 of JAZ repressors and act additively with MYC2 in the activation of jasmonate responses.  
681 *Plant Cell* 23(2), 701-715. DOI: 10.1105/tpc.110.080788.
- 682 Feyereisen, R. (2014). Insect P450 inhibitors and insecticides: challenges and opportunities. *Pest*  
683 *Management Science* 71(6), 793-800. DOI: 10.1002/ps.3895.
- 684 Fry, J.D. (1989). Evolutionary adaptation to host plants in a laboratory population of the  
685 phytophagous mite *Tetranychus urticae* Koch. *Oecologia* 81(4), 559-565. DOI:  
686 10.1007/bf00378969.
- 687 Gloss, A.D., Vassao, D.G., Hailey, A.L., Dittrich, A.C.N., Schramm, K., Reichelt, M., et al. (2014).  
688 Evolution in an ancient detoxification pathway is coupled with a transition to herbivory  
689 in the Drosophilidae. *Molecular Biology and Evolution* 31(9), 2441-2456. DOI:  
690 10.1093/molbev/msu201.
- 691 Gould, F. (1979). Rapid host range evolution in a population of the phytophagous mite  
692 *Tetranychus urticae* Koch. *Evolution* 33(3), 791-802. DOI: 10.1111/j.1558-  
693 5646.1979.tb04735.x.
- 694 Govind, G., Mittapalli, O., Griebel, T., Allmann, S., Böcker, S., and Baldwin, I.T. (2010). Unbiased  
695 transcriptional comparisons of generalist and specialist herbivores feeding on  
696 progressively defenseless *Nicotiana attenuata* plants. *Plos One* 5(1), e8735. DOI:  
697 10.1371/journal.pone.0008735.
- 698 Grbic, M., Van Leeuwen, T., Clark, R.M., Rombauts, S., Rouze, P., Grbic, V., et al. (2011). The  
699 genome of *Tetranychus urticae* reveals herbivorous pest adaptations. *Nature* 479(7374),  
700 487-492. DOI: 10.1038/nature10640.
- 701 Habig, W.H., and Jakoby, W.B. (1981). Glutathione S-transferases (rat and human). *Methods in*  
702 *Enzymology* 77, 218-231. DOI: 10.1016/s0076-6879(81)77029-0.
- 703 Halon, E., Eakteiman, G., Moshitzky, P., Elbaz, M., Alon, M., Pavlidi, N., et al. (2015). Only a  
704 minority of broad-range detoxification genes respond to a variety of phytotoxins in  
705 generalist *Bemisia tabaci* species. *Scientific Reports* 5, 17975. DOI: 10.1038/srep17975.



- 706 Heidel-Fischer, H.M., Kirsch, R., Reichelt, M., Ahn, S.-J., Wielsch, N., Baxter, S.W., et al. (2019).  
707 An insect counteradaptation against host plant defenses evolved through concerted  
708 neofunctionalization. *Molecular Biology and Evolution* 36(5), 930-941. DOI:  
709 10.1093/molbev/msz019.
- 710 Heidel-Fischer, H.M., and Vogel, H. (2015). Molecular mechanisms of insect adaptation to plant  
711 secondary compounds. *Current Opinion in Insect Science* 8, 8-14. DOI:  
712 10.1016/j.cois.2015.02.004.
- 713 Heitz, T., Widemann, E., Lugan, R., Miesch, L., Ullmann, P., Desaubry, L., et al. (2012).  
714 Cytochromes P450 CYP94C1 and CYP94B3 catalyze two successive oxidation steps of  
715 plant pormone jasmonoyl-isoleucine for catabolic turnover. *Journal of Biological*  
716 *Chemistry* 287(9), 6296-6306. DOI: 10.1074/jbc.M111.316364.
- 717 Helmus, M.R., and Dussourd, D.E. (2005). Glues or poisons: which triggers vein cutting by  
718 monarch caterpillars? *Chemoecology* 15(1), 45-49. DOI: 10.1007/s00049-005-0291-y.
- 719 Hogenhout, S.A., and Bos, J.I. (2011). Effector proteins that modulate plant-insect interactions.  
720 *Current Opinion in Plant Biology* 14(4), 422-428. DOI: 10.1016/j.pbi.2011.05.003.
- 721 Hull, A.K., Vij, R., and Celenza, J.L. (2000). *Arabidopsis* cytochrome P450s that catalyze the first  
722 step of tryptophan-dependent indole-3-acetic acid biosynthesis. *Proceedings of the*  
723 *National Academy of Sciences* 97(5), 2379-2384. DOI: 10.1073/pnas.040569997.
- 724 Jeschke, V., Gershenson, J., and Vassão, D.G. (2016). A mode of action of glucosinolate-derived  
725 isothiocyanates: Detoxification depletes glutathione and cysteine levels with  
726 ramifications on protein metabolism in *Spodoptera littoralis*. *Insect Biochemistry and*  
727 *Molecular Biology* 71, 37-48. DOI: 10.1016/j.ibmb.2016.02.002.
- 728 Jonckheere, W., Dermauw, W., Khalighi, M., Pavlidi, N., Reubens, W., Baggerman, G., et al.  
729 (2018). A gene family coding for salivary proteins (SHOT) of the polyphagous spider mite  
730 *Tetranychus urticae* exhibits fast host-dependent transcriptional plasticity. *Molecular*  
731 *Plant-Microbe Interactions* 31(1), 112-124. DOI: 10.1094/mpmi-06-17-0139-r.
- 732 Jonckheere, W., Dermauw, W., Zhurov, V., Wybouw, N., Van den Bulcke, J., Villarroel, C.A., et al.  
733 (2016). The salivary protein repertoire of the polyphagous spider mite *Tetranychus*  
734 *urticae*: a quest for effectors. *Molecular & Cellular Proteomics* 15(12), 3594-3613. DOI:  
735 10.1074/mcp.M116.058081.
- 736 Kaloshian, I., and Walling, L.L. (2016). Hemipteran and dipteran pests: Effectors and plant host  
737 immune regulators. *Journal of Integrative Plant Biology* 58(4), 350-361. DOI:  
738 10.1111/jipb.12438.
- 739 Kant, M.R., Sabelis, M.W., Haring, M.A., and Schuurink, R.C. (2008). Intraspecific variation in a  
740 generalist herbivore accounts for differential induction and impact of host plant  
741 defences. *Proceedings of the Royal Society B-Biological Sciences* 275(1633), 443-452.  
742 DOI: 10.1098/rspb.2007.1277.
- 743 Kim, J.H., and Jander, G. (2007). *Myzus persicae* (green peach aphid) feeding on *Arabidopsis*  
744 induces the formation of a deterrent indole glucosinolate. *Plant Journal* 49(6), 1008-  
745 1019. DOI: 10.1111/j.1365-313X.2006.03019.x.
- 746 Kim, J.H., Lee, B.W., Schroeder, F.C., and Jander, G. (2008). Identification of indole glucosinolate  
747 breakdown products with antifeedant effects on *Myzus persicae* (green peach aphid).  
748 *Plant Journal* 54(6), 1015-1026. DOI: 10.1111/j.1365-313X.2008.03476.x.
- 749 Li, W., Schuler, M.A., and Berenbaum, M.R. (2003). Diversification of furanocoumarin-  
750 metabolizing cytochrome P450 monooxygenases in two papilionids: Specificity and  
751 substrate encounter rate. *Proceedings of the National Academy of Sciences* 100, 14593-  
752 14598. DOI: 10.1073/pnas.1934643100.

- 753 Li, X., Baudry, J., Berenbaum, M.R., and Schuler, M.A. (2004). Structural and functional  
754 divergence of insect CYP6B proteins: From specialist to generalist cytochrome P450.  
755 *Proceedings of the National Academy of Sciences* 101(9), 2939-2944. DOI:  
756 10.1073/pnas.0308691101.
- 757 Li, X., Schuler, M.A., and Berenbaum, M.R. (2007). Molecular mechanisms of metabolic  
758 resistance to synthetic and natural xenobiotics. *Annual Review of Entomology* 52, 231-  
759 253. DOI: 10.1146/annurev.ento.51.110104.151104.
- 760 Magalhaes, S., Fayard, J., Janssen, A., Carbonell, D., and Olivieri, I. (2007). Adaptation in a spider  
761 mite population after long-term evolution on a single host plant. *Journal of Evolutionary*  
762 *Biology* 20(5), 2016-2027. DOI: 10.1111/j.1420-9101.2007.01365.x.
- 763 Mao, W., Rupasinghe, S., Zangerl, A.R., Schuler, M.A., and Berenbaum, M.R. (2006). Remarkable  
764 substrate-specificity of CYP6AB3 in *Depressaria pastinacella*, a highly specialized  
765 caterpillar. *Insect Molecular Biology* 15(2), 169-179. DOI: 10.1111/j.1365-  
766 2583.2006.00623.x.
- 767 Masters, B.S.S., and Okita, R.T. (1980). The history, properties, and function of NADPH-  
768 cytochrome P-450 reductase. *Pharmacology & Therapeutics* 9(2), 227-244. DOI:  
769 10.1016/S0163-7258(80)80020-9.
- 770 Mathers, T.C., Chen, Y., Kaithakottil, G., Legeai, F., Mugford, S.T., Baa-Puyoulet, P., et al. (2017).  
771 Rapid transcriptional plasticity of duplicated gene clusters enables a clonally  
772 reproducing aphid to colonise diverse plant species. *Genome Biology* 18(1), 27. DOI:  
773 10.1186/s13059-016-1145-3.
- 774 Migeon, A., and Dorkeld, F. (2006-2019). *Spider Mites Web: a comprehensive database for the*  
775 *Tetranychidae*. [Online]. Available: <http://www.montpellier.inra.fr/CBGP/spmweb>  
776 [Accessed August 1 2019].
- 777 Mikkelsen, M.D., Hansen, C.H., Wittstock, U., and Halkier, B.A. (2000). Cytochrome P450  
778 CYP79B2 from *Arabidopsis* catalyzes the conversion of tryptophan to indole-3-  
779 acetaldoxime, a precursor of indole glucosinolates and indole-3-acetic acid. *Journal of*  
780 *Biological Chemistry* 275(43), 33712-33717. DOI: 10.1074/jbc.M001667200.
- 781 Muller, C., Vogel, H., and Heckel, D.G. (2017). Transcriptional responses to short-term and long-  
782 term host plant experience and parasite load in an oligophagous beetle. *Molecular*  
783 *Ecology* 26(22), 6370-6383. DOI: 10.1111/mec.14349.
- 784 Musser, R.O., Hum-Musser, S.M., Eichenseer, H., Peiffer, M., Ervin, G., Murphy, J.B., et al. (2002).  
785 Herbivory: caterpillar saliva beats plant defences. *Nature* 416(6881), 599-600. DOI:  
786 10.1038/416599a.
- 787 Musser, R.O., Hum-Musser, S.M., Lee, H.K., DesRochers, B.L., Williams, S.A., and Vogel, H. (2012).  
788 Caterpillar labial saliva alters tomato plant gene expression. *Journal of Chemical Ecology*  
789 38(11), 1387-1401. DOI: 10.1007/s10886-012-0198-3.
- 790 Park, J.H., Meriwether, B.P., Clodfelder, P., and Cunningham, L.W. (1961). The hydrolysis of p-  
791 nitrophenyl acetate catalyzed by 3-phosphoglyceraldehyde dehydrogenase. *Journal of*  
792 *Biological Chemistry* 236, 136-141.
- 793 Rajniak, J., Barco, B., Clay, N.K., and Sattely, E.S. (2015). A new cyanogenic metabolite in  
794 *Arabidopsis* required for inducible pathogen defence. *Nature* 525(7569), 376-379. DOI:  
795 10.1038/nature14907.
- 796 Ratzka, A., Vogel, H., Kliebenstein, D.J., Mitchell-Olds, T., and Kroymann, J. (2002). Disarming the  
797 mustard oil bomb. *Proceedings of the National Academy of Sciences* 99(17), 11223-  
798 11228. DOI: 10.1073/pnas.172112899.
- 799 Rieu, I., and Powers, S.J. (2009). Real-Time Quantitative RT-PCR: Design, calculations, and  
800 statistics. *Plant Cell* 21(4), 1031-1033. DOI: 10.1105/tpc.109.066001.

- 801 Sasabe, M., Wen, Z., Berenbaum, M.R., and Schuler, M.A. (2004). Molecular analysis of  
802 CYP321A1, a novel cytochrome P450 involved in metabolism of plant allelochemicals  
803 (furanocoumarins) and insecticides (cypermethrin) in *Helicoverpa zea*. *Gene* 338(2), 163-  
804 175. DOI: 10.1016/j.gene.2004.04.028.
- 805 Schramm, K., Vassao, D.G., Reichelt, M., Gershenzon, J., and Wittstock, U. (2012). Metabolism of  
806 glucosinolate-derived isothiocyanates to glutathione conjugates in generalist  
807 lepidopteran herbivores. *Insect Biochemistry and Molecular Biology* 42(3), 174-182. DOI:  
808 10.1016/j.ibmb.2011.12.002.
- 809 Schuler, M.A. (2011). P450s in plant–insect interactions. *Biochimica et Biophysica Acta* 1814(1),  
810 36-45. DOI: 10.1016/j.bbapap.2010.09.012.
- 811 Schweizer, F., Fernandez-Calvo, P., Zander, M., Diez-Diaz, M., Fonseca, S., Glauser, G., et al.  
812 (2013). *Arabidopsis* basic Helix-Loop-Helix transcription factors MYC2, MYC3, and MYC4  
813 regulate glucosinolate biosynthesis, insect performance, and feeding behavior. *Plant Cell*  
814 25(8), 3117-3132. DOI: 10.1105/tpc.113.115139.
- 815 Schweizer, F., Heidel-Fischer, H., Vogel, H., and Reymond, P. (2017). *Arabidopsis* glucosinolates  
816 trigger a contrasting transcriptomic response in a generalist and a specialist herbivore.  
817 *Insect Biochemistry and Molecular Biology* 85, 21-31. DOI: 10.1016/j.ibmb.2017.04.004.
- 818 Shi, Y., Wang, H., Liu, Z., Wu, S., Yang, Y., Feyereisen, R., et al. (2018). Phylogenetic and  
819 functional characterization of ten P450 genes from the CYP6AE subfamily of *Helicoverpa*  
820 *armigera* involved in xenobiotic metabolism. *Insect Biochemistry and Molecular Biology*  
821 93, 79-91. DOI: 10.1016/j.ibmb.2017.12.006.
- 822 Snoeck, S., Pavlidi, N., Pipini, D., Vontas, J., Dermauw, W., and Van Leeuwen, T. (2019). Substrate  
823 specificity and promiscuity of horizontally transferred UDP-glycosyltransferases in the  
824 generalist herbivore *Tetranychus urticae*. *Insect Biochemistry and Molecular Biology* 109,  
825 116-127. DOI: 10.1016/j.ibmb.2019.04.010.
- 826 Stireman, J.O., and Singer, M.S. (2018). Tritrophic niches of insect herbivores in an era of rapid  
827 environmental change. *Current Opinion in Insect Science* 29, 117-125. DOI:  
828 10.1016/j.cois.2018.07.008.
- 829 Suzuki, T., Nunes, M.A., Espana, M.U., Namin, H.H., Jin, P., Bensoussan, N., et al. (2017). RNAi-  
830 based reverse genetics in the chelicerate model *Tetranychus urticae*: A comparative  
831 analysis of five methods for gene silencing. *Plos One* 12(7), e0180654. DOI:  
832 10.1371/journal.pone.0180654.
- 833 Van Leeuwen, T., and Dermauw, W. (2016). The molecular evolution of xenobiotic metabolism  
834 and resistance in chelicerate mites. *Annual Review of Entomology* 61, 475-498. DOI:  
835 10.1146/annurev-ento-010715-023907.
- 836 Villarroel, C.A., Jonckheere, W., Alba, J.M., Glas, J.J., Dermauw, W., Haring, M.A., et al. (2016).  
837 Salivary proteins of spider mites suppress defenses in *Nicotiana benthamiana* and  
838 promote mite reproduction. *Plant Journal* 86(2), 119-131. DOI: 10.1111/tpj.13152.
- 839 Wadleigh, R.W., and Yu, S.J. (1988). Detoxification of isothiocyanate allelochemicals by  
840 glutathione transferase in three lepidopterous species. *Journal of Chemical Ecology*  
841 14(4), 1279-1288. DOI: 10.1007/bf01019352.
- 842 Whiteman, N.K., Gloss, A.D., Sackton, T.B., Groen, S.C., Humphrey, P.T., Lapoint, R.T., et al.  
843 (2012). Genes involved in the evolution of herbivory by a leaf-mining, Drosophilid fly.  
844 *Genome Biology and Evolution* 4(9), 900-916. DOI: 10.1093/gbe/evs063.
- 845 Whiteman, N.K., Groen, S.C., Chevasco, D., Bear, A., Beckwith, N., Gregory, T.R., et al. (2011).  
846 Mining the plant-herbivore interface with a leafmining *Drosophila* of *Arabidopsis*.  
847 *Molecular Ecology* 20(5), 995-1014. DOI: 10.1111/j.1365-294X.2010.04901.x.

- 848 Widemann, E., Grausem, B., Renault, H., Pineau, E., Heinrich, C., Lugan, R., et al. (2015).  
849 Sequential oxidation of Jasmonoyl-Phenylalanine and Jasmonoyl-Isoleucine by multiple  
850 cytochrome P450 of the CYP94 family through newly identified aldehyde intermediates.  
851 *Phytochemistry* 117, 388-399. DOI: 10.1016/j.phytochem.2015.06.027.
- 852 Wittstock, U., Agerbirk, N., Stauber, E.J., Olsen, C.E., Hippler, M., Mitchell-Olds, T., et al. (2004).  
853 Successful herbivore attack due to metabolic diversion of a plant chemical defense.  
854 *Proceedings of the National Academy of Sciences* 101(14), 4859-4864. DOI:  
855 10.1073/pnas.0308007101.
- 856 Wittstock, U., and Burow, M. (2010). Glucosinolate breakdown in *Arabidopsis*: Mechanism,  
857 regulation and biological significance. *The Arabidopsis Book* 2010(8). DOI:  
858 10.1199/tab.0134.
- 859 Wu, S., Peiffer, M., Luthe, D.S., and Felton, G.W. (2012). ATP hydrolyzing salivary enzymes of  
860 caterpillars suppress plant defenses. *Plos One* 7(7), e41947. DOI:  
861 10.1371/journal.pone.0041947.
- 862 Wybouw, N., Balabanidou, V., Ballhorn, D.J., Dermauw, W., Grbic, M., Vontas, J., et al. (2012). A  
863 horizontally transferred cyanase gene in the spider mite *Tetranychus urticae* is involved  
864 in cyanate metabolism and is differentially expressed upon host plant change. *Insect*  
865 *Biochemistry and Molecular Biology* 42(12), 881-889. DOI: 10.1016/j.ibmb.2012.08.002.
- 866 Wybouw, N., Dermauw, W., Tirry, L., Stevens, C., Grbic, M., Feyereisen, R., et al. (2014). A gene  
867 horizontally transferred from bacteria protects arthropods from host plant cyanide  
868 poisoning. *Elife* 3, e02365. DOI: 10.7554/eLife.02365.
- 869 Wybouw, N., Zhurov, V., Martel, C., Bruinsma, K.A., Hendrickx, F., Grbic, V., et al. (2015).  
870 Adaptation of a polyphagous herbivore to a novel host plant extensively shapes the  
871 transcriptome of herbivore and host. *Molecular Ecology* 24(18), 4647-4663. DOI:  
872 10.1111/mec.13330.
- 873 Zarate, S.I., Kempema, L.A., and Walling, L.L. (2007). Silverleaf whitefly induces salicylic acid  
874 defenses and suppresses effectual jasmonic acid defenses. *Plant Physiology* 143(2), 866-  
875 875. DOI: 10.1104/pp.106.090035.
- 876 Zhao, C., Escalante, L.N., Chen, H., Benatti, T.R., Qu, J., Chellapilla, S., et al. (2015). A massive  
877 expansion of effector genes underlies gall-formation in the wheat pest *Mayetiola*  
878 *destructor*. *Current Biology* 25(5), 613-620. DOI: 10.1016/j.cub.2014.12.057.
- 879 Zhurov, V., Navarro, M., Bruinsma, K.A., Arbona, V., Santamaria, M.E., Cazaux, M., et al. (2014).  
880 Reciprocal responses in the interaction between *Arabidopsis* and the cell-content-  
881 feeding chelicerate herbivore spider mite. *Plant Physiology* 164(1), 384-399. DOI:  
882 10.1104/pp.113.231555.
- 883
- 884

885 **Figure Legends**

886 **Figure 1.** *Arabidopsis* induced responses to feeding of the two-spotted spider mite (TSSM)  
887 *Tetranychus urticae*. (A) The fecundity of bean-reared TSSM (London strain; ancestral population)  
888 upon feeding on +/- MeJA treated Col-0 plants (left) and on Col-0 wild type, *cyp79b2 cyp79b3*  
889 mutant plants lacking Trp-derived secondary metabolites, and *myc2 myc3 myc4* mutant plants  
890 (*myc2,3,4*) that lack JA-dependent induced responses (right). For fecundity on +/- MeJA treated  
891 Col-0 leaves, the number of eggs was counted over 24 h and is presented as mean number of  
892 eggs laid by a female mite per day  $\pm$  SEM; experiment was replicated in nine biological  
893 replicates/trial in two independent trials. Asterisk indicates a significant difference between  
894 treated and control samples (ANOVA: \*\*\* $P < 0.001$ ). For fecundity on different genotypes (right),  
895 the number of eggs was counted over two days and is presented as mean number of eggs laid  
896 by a female mite per day  $\pm$  SEM; experiment was replicated in five biological replicates/trial in  
897 three independent trials. Different letters represent significant difference between means  
898 (Tukey's HSD test,  $\alpha = 0.05$ ). (B) A simplified schematic of *Arabidopsis* induced responses to  
899 TSSM feeding. Jasmonic acid (JA), its bioactive conjugate jasmonoyl-isoleucine (JA-Ile), and  
900 MYC2, MYC3 and MYC4 (MYC2,3,4) transcriptional activators transduce the recognition of TSSM  
901 herbivory and induce the expression of JA-regulated genes such as *ALLENE OXIDE SYNTHASE*  
902 (*AOS*), *CYP79B2* and *CYP79B3*. *AOS* is a JA biosynthetic gene, while *CYP79B2* and *CYP79B3*  
903 encode enzymes required for the biosynthesis of Trp-derived secondary metabolites.

904  
905 **Figure 2.** Experimental evolution of *Tetranychus urticae* adaptation to *Arabidopsis*. (A) A  
906 schematic of the experimental evolution procedure. The ancestral population was reared on  
907 beans. Triplicated ancestral populations were selected on *cyp79b2 cyp79b3* and Col-0 plants for  
908 at least 25 generations. (B) Performance of ancestral and selected populations on bean (top),  
909 *cyp79b2 cyp79b3* (middle) and Col-0 (bottom) plants. Mites from *Arabidopsis*-selected  
910 populations were transferred from their respective rearing hosts, *cyp79b2 cyp79b3* and Col-0  
911 plants, to beans for two generations prior to testing their performance (an indirect transfer  
912 regime). The performance was measured as the size of total population derived from twenty  
913 adult female mites and seven days post infestation. Data are represented as mean  $\pm$  SEM,  $n=4$ .  
914 Statistics were performed on total population counts. See also Figure S1. (C) Fecundity of the  
915 ancestral (bean-a) and populations #3 of *Arabidopsis*-selected mites (*cyp*-a and Col-a) upon  
916 feeding on Col-0 and *cyp79b2 cyp79b3* plants. Fecundity was measured over six days and data  
917 are presented as mean number of eggs laid by a female mite per day  $\pm$  SEM; experiment was  
918 replicated in ten biological replicates/trial in three independent trials. (D) Leaf damage of Col-0  
919 and *cyp79b2 cyp79b3* *Arabidopsis* plants upon herbivory of ancestral (bean-a), and populations  
920 #3 of *Arabidopsis*-selected mites (*cyp*-a and Col-a). Data are represented as mean  $\pm$  SEM;  
921 experiment was replicated in six biological replicates/trial in three independent trials. Different  
922 letters represent significant differences between means (Tukey's HSD test,  $\alpha = 0.05$ ).

923  
924 **Figure 3.** Induced *Arabidopsis* responses upon feeding of bean-a, *cyp*-a and Col-a mites for 24 h.  
925 (A) Expression of *AOS*, *CYP79B2*, *CYP79B3* and *MYC2* genes in response to bean-a, *cyp*-a and Col-  
926 a mite feeding. Shown are means  $\pm$  SEM of FCs of expression levels detected by RT-qPCR;  
927 experiment was replicated in three biological replicates/trial in three independent trials. Primer  
928 sequences and amplification efficiencies (E) used in qPCR are shown in Supplemental Table 1.  
929 *PEROXIN4* (*AT5G25760*), was used as the reference gene. (B) Levels of JA and JA-Ile (ng g<sup>-1</sup> fresh  
930 weight), and relative level of the indol-3-ylmethyl glucosinolate (I3M, shown as normalized peak  
931 area), in 3-week-old Col-0 plants after herbivory of bean-a, *cyp*-a and Col-a mites for 24 h.  
932 Values are means  $\pm$  SEM; experiment was replicated in three biological replicates/trial in two

933 independent trials. Different letters represent significant differences between means (Tukey's  
934 HSD test,  $\alpha = 0.05$ ).

935

936 **Figure 4.** The effect of mite host-adaptation state and plant hosts on the expression levels of  
937 candidate cytochrome P450 (CYP) and UDP-glycosyltransferases (UGT) mite genes. (A) CYP392A1  
938 (*tetur07g06410*), CYP392A16 (*tetur06g04520*) and CYP392D8 (*tetur03g05070*). (B) UGT201A2v2  
939 (*tetur02g02480*), UGT204B1 (*tetur02g09830*) and UGT204A5 (*tetur05g00090*). Shown are  
940 means  $\pm$  SEM for relative quantity of expression normalized to *RP49* (*tetur18g03590*) reference  
941 gene, experiment was replicated in three biological replicates/trial; additional two independent  
942 experimental trials had similar results. Primer sequences and amplification efficiencies (E) used  
943 in qPCR are shown in Supplemental Table 1. Different letters represent significant differences  
944 between means (Tukey's HSD test,  $\alpha = 0.05$ ).

945

946 **Figure 5.** The requirements of glutathione-S-transferase and cytochrome P450 activities for  
947 *Tetranychus urticae* adaptation to *Arabidopsis*. (A, D) The activities of glutathione-S-transferases  
948 (A) and cytochrome P450s (D) in bean-a, *cyp-a* and Col-a mites (reared on beans for two  
949 generations) feeding on bean, *cyp79b2 cyp79b3* or Col-0 plants. Data are represented as mean  $\pm$   
950 SEM, n=4. Different letters represent significant differences between means (Tukey's HSD test,  $\alpha$   
951 = 0.05). (B, E, G) The activities of glutathione-S-transferases (B) and cytochrome P450s (E, G) in  
952 Col-a mites feeding on Col-0 plants after the application of diethyl maleate (DEM, an inhibitor of  
953 GST activity; in B), piperonyl butoxide (PBO, an inhibitor of P450 activity; in E) and  
954 trichlorophenylpropynyl ether (TCPPE, inhibitor of P450 activity; in G). Data are represented as  
955 mean  $\pm$  SEM, n=5. (C, F) The effects of DEM (C) and PBO (F) treatments on fecundity of bean-a  
956 and Col-a mites upon feeding on Col-0 and *cyp79b2 cyp79b3* plants. Fecundity was measured  
957 over six days and data are presented as mean number of eggs laid by a female mite per day  $\pm$   
958 SEM; experiment was replicated in ten biological replicates/trial in three independent trials. (H)  
959 The effect of TCPPE treatment on fecundity of bean-a and Col-a mites upon feeding on Col-0,  
960 *cyp79b2 cyp79b3* or bean plants. Fecundity was measured over six days and data are presented  
961 as mean number of eggs laid by a female mite per day  $\pm$  SEM; experiment was replicated in ten  
962 biological replicates/trial in three independent trials. Asterisks in panels B, C, E-H indicate a  
963 significant difference between treated and control samples (unpaired Student's t test: \*P <0.05,  
964 \*\*P<0.01, \*\*\*P<0.001). See also Figure S2.

965

966 **Figure 6.** The requirement of CPR and P450 activity for *Tetranychus urticae* adaptation to  
967 *Arabidopsis*. (A) Whole-mount *in-situ* hybridization with anti-sense probe of *Tu-CPR* in *T. urticae*  
968 (i) adult female, (ii) adult male, (iii) background control (hybridization with sense probe),  
969 enlarged view of panel 'i' showing (iv) epithelium (v) ovaries and (vi and vii) digestive cells of  
970 adult female. (B-D) The effects of dsRNA-*Tu-CPR*. (B) Relative level of *Tu-CPR* transcript  
971 normalized with *RP49* in dsRNA treated Col-a mites (mean  $\pm$  SEM, n=8, unpaired Student's t test  
972 \*\*\* P<0.001). (C) The activity of cytochrome P450s in dsRNA treated Col-a mite upon feeding on  
973 Col-0 plants (mean  $\pm$  SEM, n=5, unpaired Student's t test \*\*\* P<0.001). (D) The fecundity of  
974 dsRNA treated Col-a mites feeding on Col-0 or bean plants. Fecundity was measured over two  
975 days (3 and 4 dpi) and data are presented as mean number of eggs laid by a female mite per day  
976  $\pm$  SEM; the experiment was replicated in ten (for Col-0 plants) and 4 (for bean plants) biological  
977 replicates/trial in three independent trials. Data are represented as mean  $\pm$  SEM (unpaired  
978 Student's t test \*\*\* P<0.001). Scale bars in (F): (i-iii) 20 $\mu$ m; (iv-vii) 100 $\mu$ m. See also Figure S3.

979

980 **Supplemental Data**

981 **Supplemental Table 1.** Gene-specific primer sequences used for real-time quantitative RT-PCR.

982

983 **Supplemental Figure 1.** Experimental evolution of *Tetranychus urticae* adaptation to *Arabidopsis*.

984 Performance of ancestral and selected populations on bean (top), *cyp79b2 cyp79b3* (middle)

985 and Col-0 (bottom) plants. Mites were transferred directly from their respective rearing hosts to

986 experimental bean, *cyp79b2 cyp79b3* and Col-0 plants. The performance was measured as the

987 size of total population derived from twenty adult female mites and seven days post infestation.

988 Data are represented as mean  $\pm$  SEM, n=4. Statistics were performed on total population counts.

989

990 **Supplemental Figure 2.** The requirement of esterase activity for *Tetranychus urticae* adaptation

991 to *Arabidopsis*. (A) The esterase activities in bean-a, *cyp-a* and Col-a mites (reared on beans for

992 two generations) feeding on bean, *cyp79b2 cyp79b3* or Col-0 plants. Data are represented as

993 mean  $\pm$  SEM, n=4. Different letters represent significant differences between means (Tukey's

994 HSD test,  $\alpha = 0.05$ ). (B) Esterase activity in Col-a mites feeding on Col-0 plants after the

995 application of S,S,S tributyl-phosphorotrithioate (DEF, an inhibitor of esterase activity). Data are

996 represented as mean  $\pm$  SEM, n=5. (C) Effects of DEF treatment on fecundity of bean-a and Col-a

997 mites upon feeding on Col-0 and *cyp79b2 cyp79b3* plants. Fecundity was assessed as mean

998 number of eggs laid by a female mite in six days  $\pm$  SEM; the experiment was replicated three

999 times using 10 biological replicates/trial. Asterisks in panels B, C, and E indicate a significant

1000 difference between treated and control samples (unpaired Student's t test: \*P <0.05, \*\*P<0.01).

1001

1002 **Supplemental Figure 3.** RNAi silencing of *Tu-CPR* gene. (A) A schematic of the *Tu-CPR* locus. DNA

1003 sequences used for the generation of dsRNA-*Tu-CPR* are shown in red (fragment CPR, 645 bp),

1004 and green (fragment CPR-1, 564 bp). UTR and coding sequences are shown as light and dark

1005 blue boxes, respectively. (B) The effect of dsRNA-*Tu-CPR*. Relative expression of *Tu-CPR*

1006 normalized with *RP49* in dsRNA treated Col-a mites (mean  $\pm$  SEM, n=8, Student's t test, ns). (C)

1007 The fecundity of dsRNA treated Col-a mites feeding on Col-0 and bean plants. Fecundity was

1008 measured over two days (3 and 4 dpi) and data are presented as mean number of eggs laid by a

1009 female mite per day  $\pm$  SEM; the experiment was replicated in ten (for Col-0 plants) and 4 (for

1010 bean plants) biological replicates/trial in three independent trials. Data are represented as mean

1011  $\pm$  SEM (Student's t test \*\*\* P<0.001).

FIGURE 1

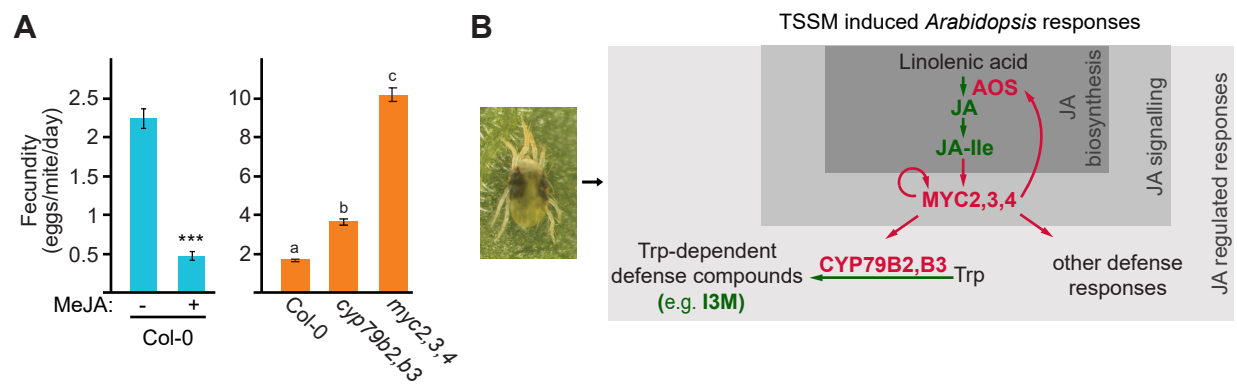



FIGURE 2

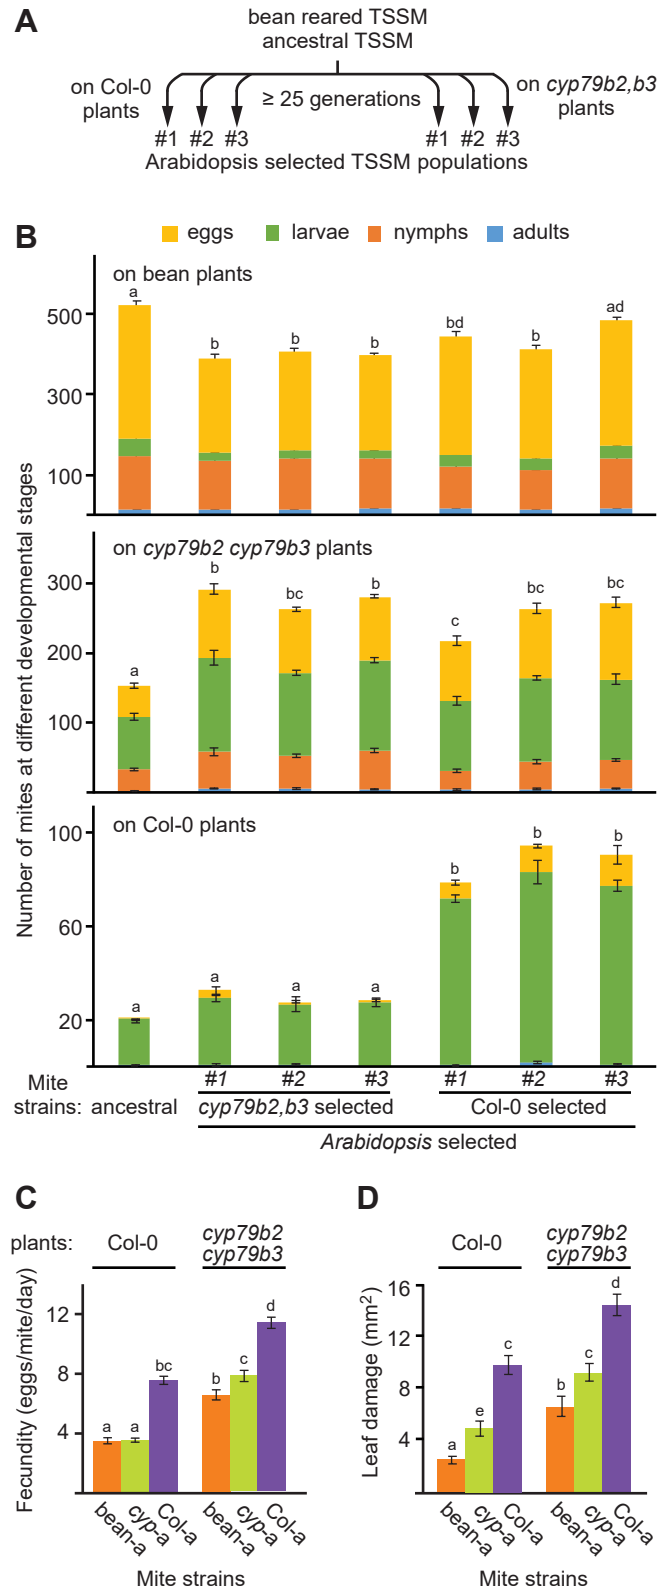

FIGURE 3

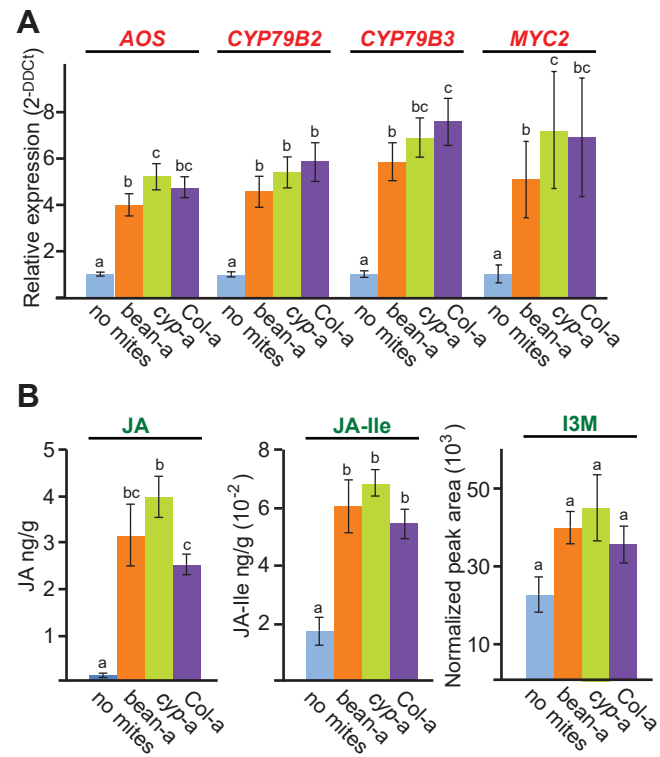

FIGURE 4

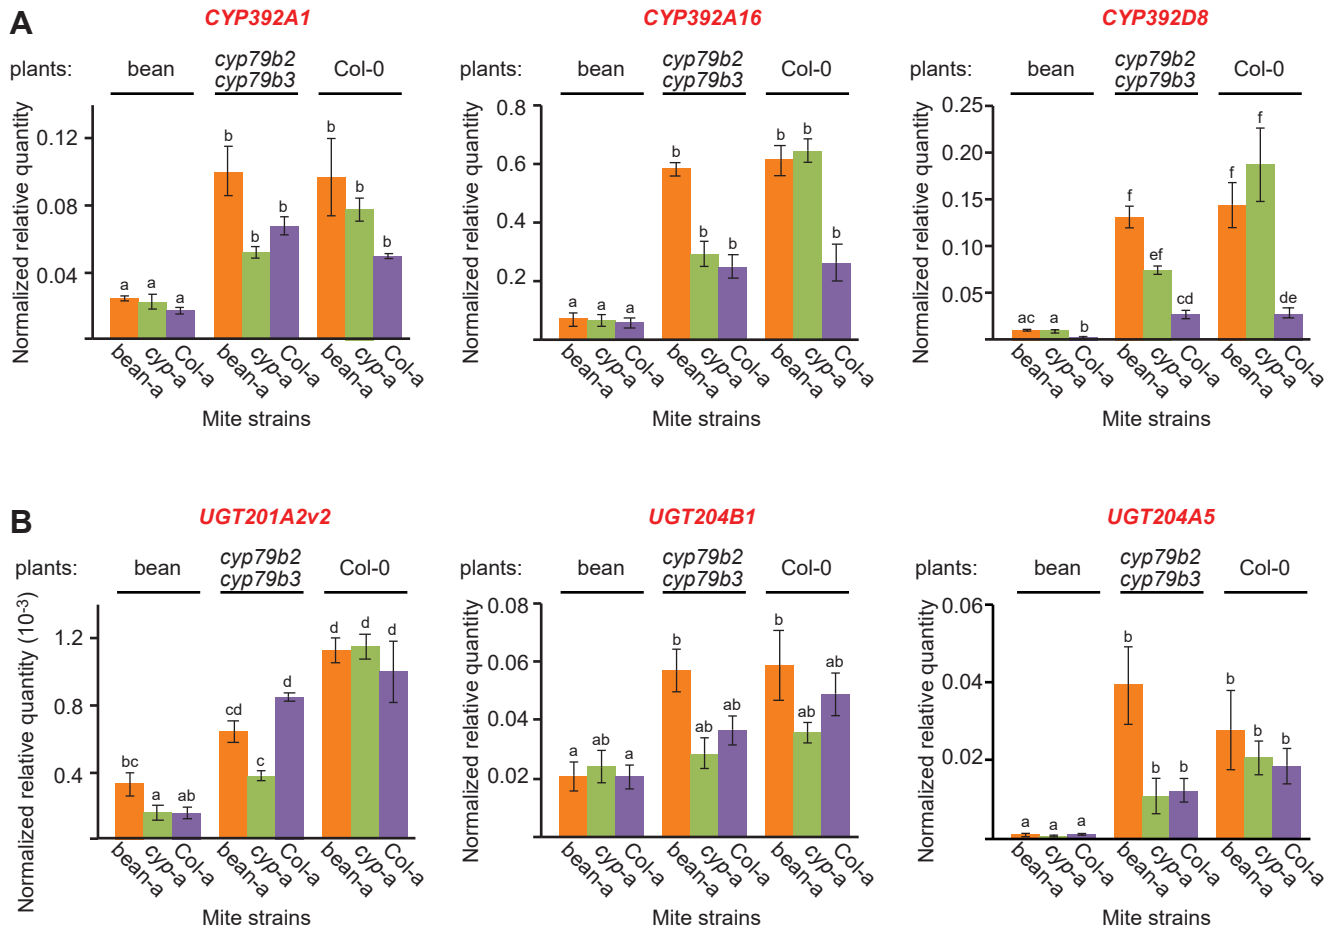

FIGURE 5

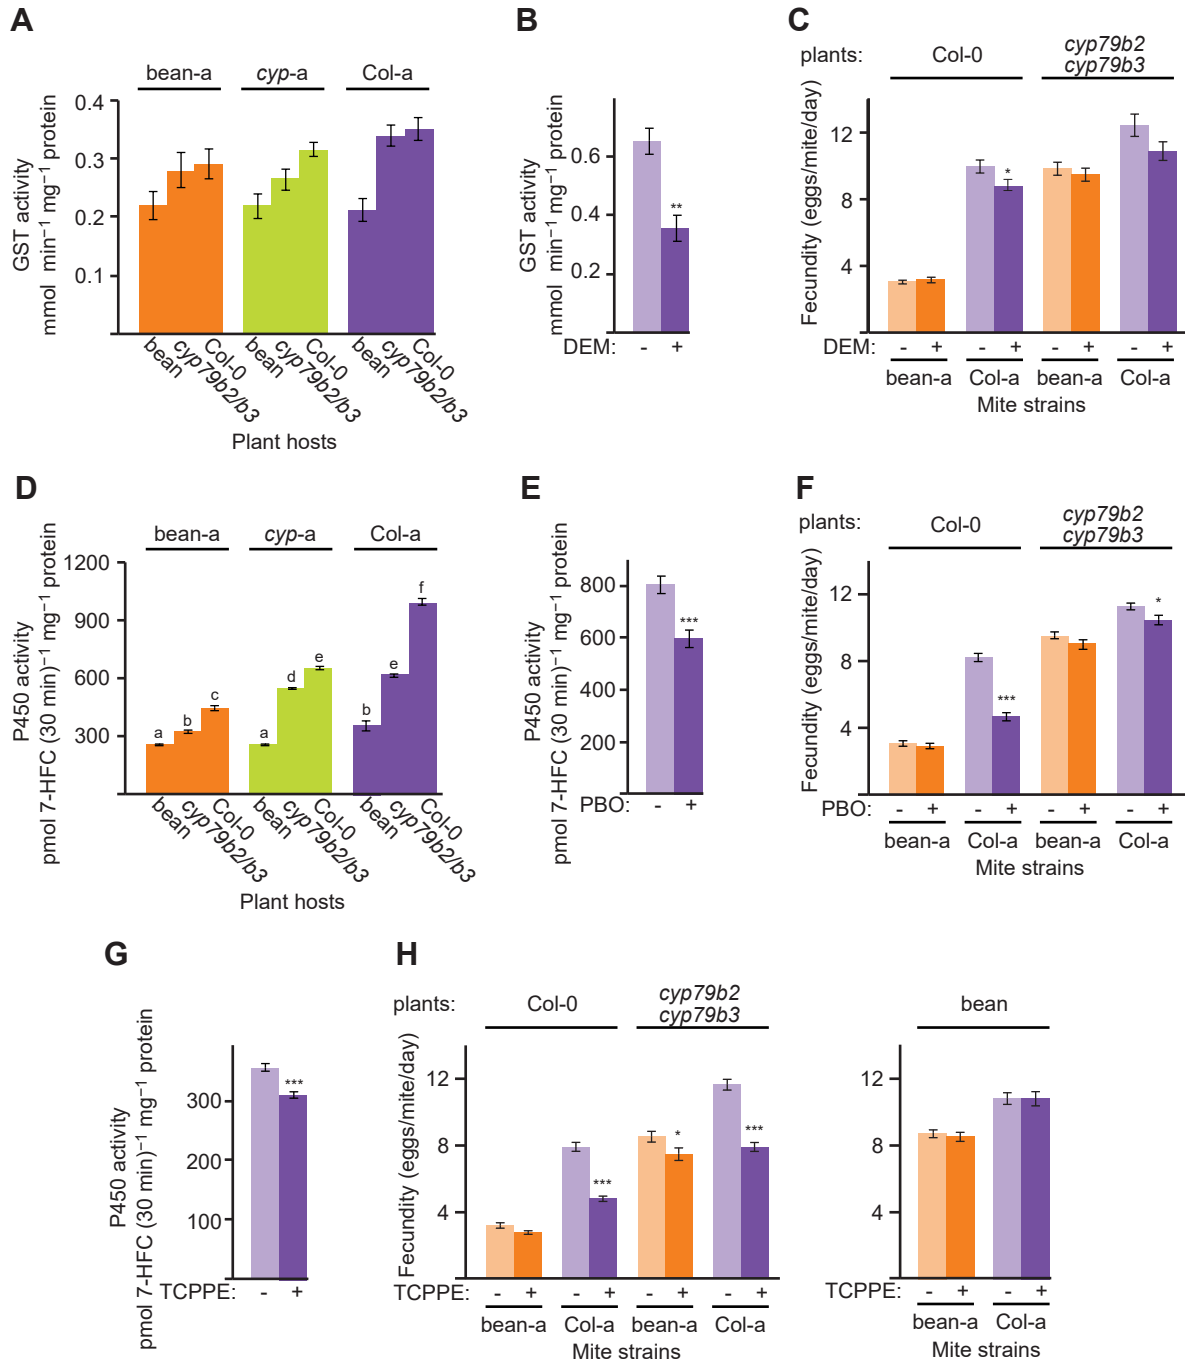

FIGURE 6

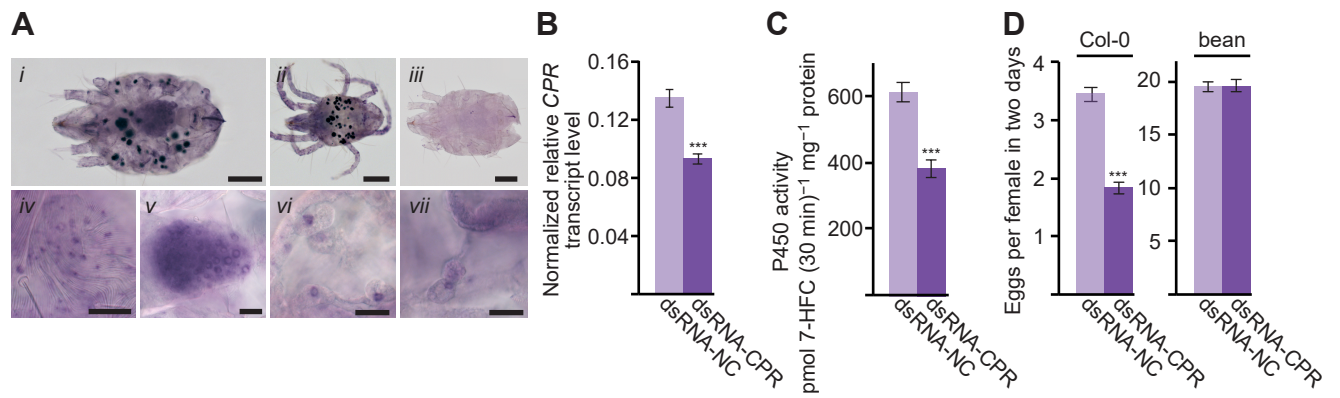

**Supplemental Table 1.** Gene-specific primer sequences used for the analysis of levels of gene expression (RT-qPCR), synthesis of dsRNA (RNAi) and preparation of probe for the *in situ* transcript localization.

| Locus ID and name                                                   | Application                | Primers                                                                      | Efficiency     |
|---------------------------------------------------------------------|----------------------------|------------------------------------------------------------------------------|----------------|
| <i>tetur07g06410</i><br><i>CYP392A1</i>                             | RT-qPCR                    | F: 5'-GACGCCTTCGCAAATGATGC-3'<br>R: 5'-TAACCGTCTGTGTTACGCC-3'                | 0.929          |
| <i>tetur06g04520</i><br><i>CYP392A16</i>                            | RT-qPCR                    | F: 5'-TTGATTGGGCTTGCCCTCTT-3'<br>R: 5'-AGCCAACAATCGGAAGACCC-3'               | 0.903          |
| <i>tetur03g05070</i><br><i>CYP392D8</i>                             | RT-qPCR                    | F: 5'-ACCAGAGAGATTCCTCAGCG-3'<br>R: 5'-AAAGCCAAAGTTGCACCAGG-3'               | 1.030          |
| <i>tetur02g02480</i><br><i>UGT201A2v2</i>                           | RT-qPCR                    | F: 5'-TCGAGAAGTGGAGTAGC-3'<br>R: 5'-TAGCAGGCAAAGGTGTTCCA-3'                  | 1.090          |
| <i>tetur02g09830</i><br><i>UGT204B1</i>                             | RT-qPCR                    | F: 5'-GCTTCGGTTGAGAAACGTGG-3'<br>R: 5'-AAAATCGGCATTCGCTTCGG-3'               | 1.000          |
| <i>tetur05g00090</i><br><i>UGT204A5</i>                             | RT-qPCR                    | F: 5'-TGGACGAAATCGTAGTGG-3'<br>R: 5'-AGCTCATCAAAGACCAGCGA-3'                 | 1.090          |
| <i>tetur18g03590</i><br><i>RP49</i>                                 | RT-qPCR                    | F: 5'-CTTCAAGCGGCATCAGAGC-3'<br>R: 5'-CGCATCTGACCCCTTGAACCTC-3'              | 0.976          |
| <i>AT5G42650</i><br><i>AOS</i>                                      | RT-qPCR                    | F: 5'-AAATCCAACGGCGGAGAACT-3'<br>R: 5'-TCGTCGCCAACGGTTGATAA-3'               | 0.984          |
| <i>AT4G39950</i><br><i>CYP79B2</i>                                  | RT-qPCR                    | F: 5'-GAAAAGAGGTTGTGCGGCTC-3'<br>R: 5'-TCTCACTTCACCGTCGGGTA-3'               | 0.994          |
| <i>AT2G22330</i><br><i>CYP79B3</i>                                  | RT-qPCR                    | F: 5'-TCTACCGATGCTTACGGGATTG-3'<br>R: 5'-TACAAGTTCCTTAATGGTTGGTTTG-3'        | 0.973          |
| <i>AT1G32640</i><br><i>MYC2</i>                                     | RT-qPCR                    | F: 5'-TCGCTTACATCAACGAGCTTAAATC-3'<br>R: 5'-TATCTTCACTTCAATCTCCATCCCC-3'     | 0.900          |
| <i>AT5G25760</i><br><i>PEROXIN4</i>                                 | RT-qPCR                    | F: 5'-GCTCTTATCAAAGGACCTTCGG-3'<br>R: 5'-CGAACTTGAGGAGGTTGCAAAG-3'           | 0.992          |
| <i>tetur18g03390</i><br><i>Tu-CPR</i>                               | RT-qPCR                    | F: 5'-CCATTCTTGGCACCTATCGT-3'<br>R: 5'-GCAAGGTGATCTCCAGCTTC-3'               | 0.994          |
| <i>tetur18g03390</i><br><i>Tu-CPR</i>                               | RNAi<br>(fragment 1)       | F: 5'-[T7]-CCTCGACTTCAGCCACGTTA-3'<br>R: 5'-[T7]-AACATCCCAGCCATGTTCC-3'      | not applicable |
| <i>tetur18g03390</i><br><i>Tu-CPR</i>                               | RNAi<br>(fragment 2)       | F: 5'-[T7]-ACAAACCGGTAAGGACTGCAGAGG-3'<br>R: 5'-[T7]-TGCATACACGAACGGTCTCC-3' | not applicable |
| <i>T. urticae</i> genomic scaffold 12, position 1690614-1690995, NC | RNAi<br>(negative control) | F: 5'-GCCCTCTCCTGGTTGTAAACTT-3'<br>R: 5'-CGACCCCATCAGGCTATTGA-3'             | not applicable |
| <i>tetur18g03390</i><br><i>Tu-CPR</i>                               | <i>in situ</i> (antisense) | F: 5'-[T7]-ACAAACCGGTAAGGACTGCAGAGG-3'<br>R: 5'-TGCATACACGAACGGTCTCC-3'      | not applicable |
| <i>tetur18g03390</i><br><i>Tu-CPR</i>                               | <i>in situ</i> (sense)     | F: 5'-ACAAACCGGTAAGGACTGCAGAGG-3'<br>R: 5'-[T7]-TGCATACACGAACGGTCTCC-3'      | not applicable |

[T7]: T7 RNA Polymerase promoter sequence, 5'-TAATACGACTCACTATAGGG-3'

## SUPPLEMENTAL FIGURE 1

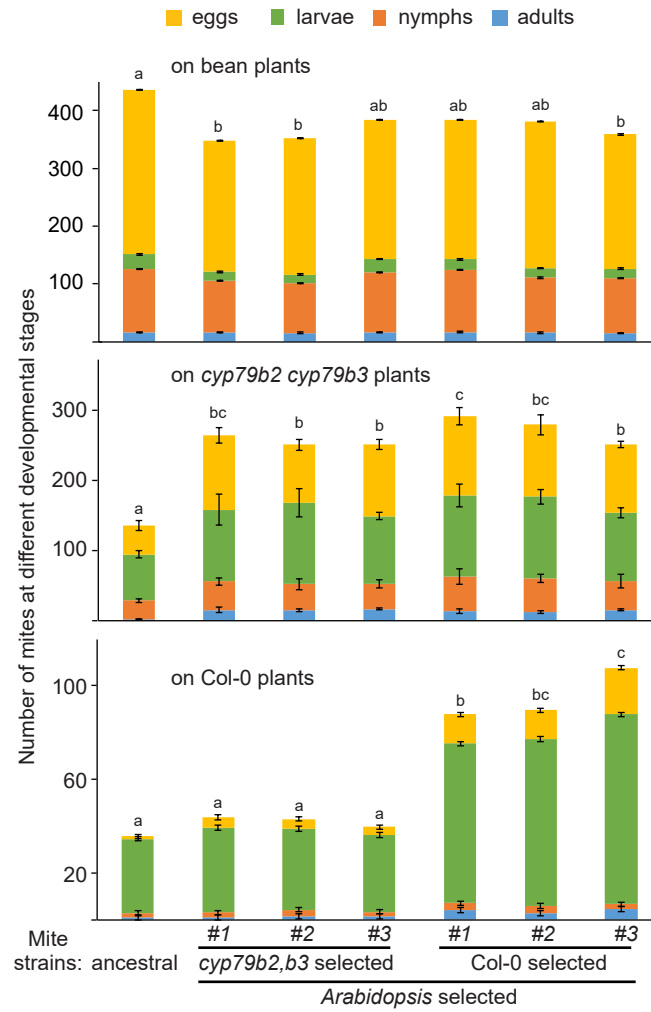

## SUPPLEMENTAL FIGURE 2

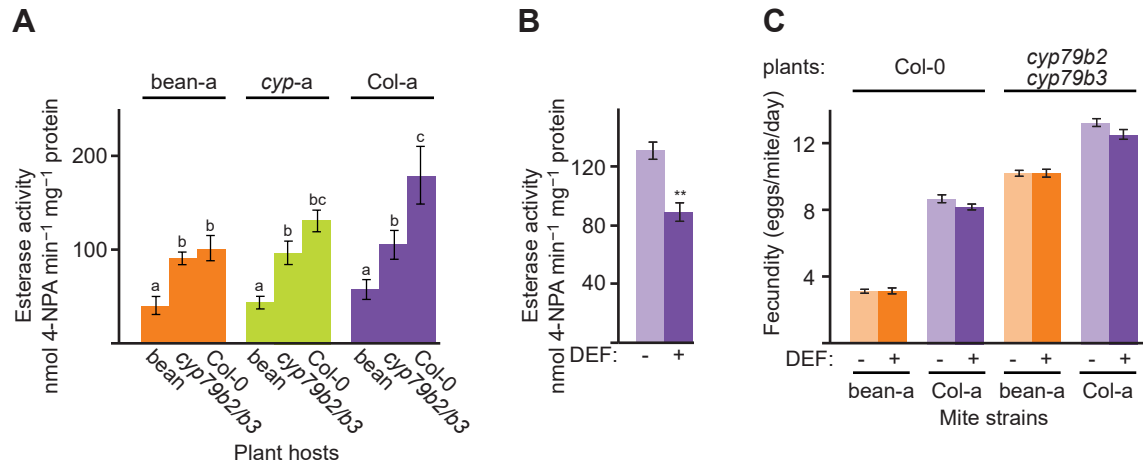



### SUPPLEMENTAL FIGURE 3

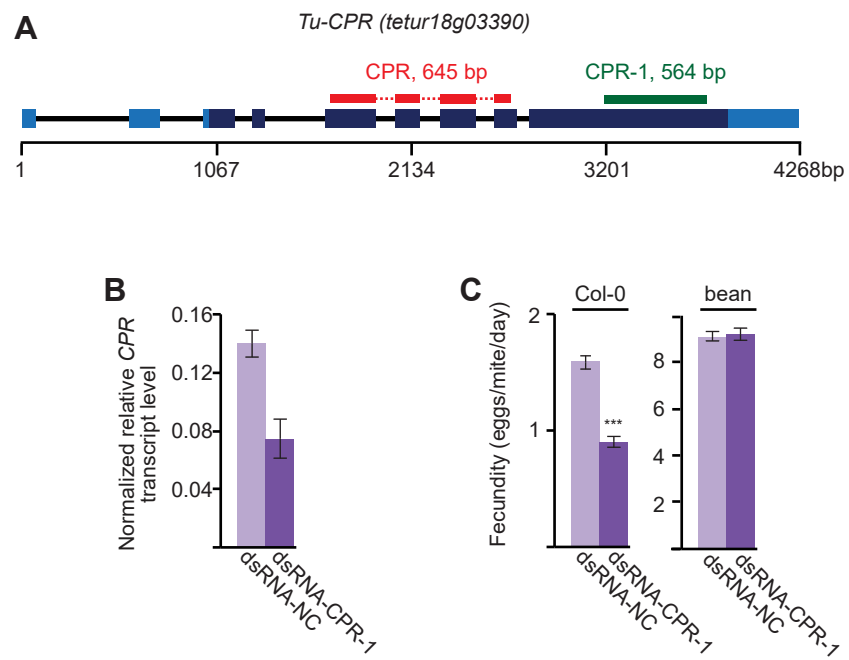

Source: https://www.biorxiv.org/content/biorxiv/early/2020/02/26/2020.02.26.966481.full.pdf
